# Supplementary material for: Insights from quantum chemical calculations into inner and outer-sphere complexation of plutonium(iv) by monoamide and carbamide extractants
Source: Royal Society of Chemistry journal article supplement (doi:10.1039/d0cp05363e), 2021-01-01
Supplement: d0cp05363e1.pdf [file d0cp05363e1.pdf]

# Theoretical study of plutonium nitrate complexes with amide derivatives

October 3, 2020

## SUPPORTING INFORMATIONS

### 1 Proton affinity of the ligands

The proton affinity of the ligands, the amount of energy produced by proton capture, have been also calculated at the same level of theory. The proton affinity of a ligand L is defined as the enthalpy change associated with the following gas-phase reaction:

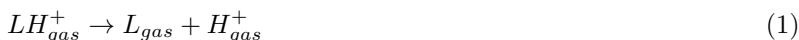

A natural population analysis (NPA) was performed using natural bond orbital analysis (NBO) to determine atomic electronic charges.[2]

Intrinsic properties of the ligands, such as basicity and electronic properties are important parameters for understanding their ability to bind a metal ion. Atomic charges and molecular polarizabilities have been calculated for the different ligands are reported in Table 1. Atomic charges were determined from a Natural Population Analysis (NPA). The charges of the complexing oxygen atom are slightly affected by the lengthening of the alkyl chains, they vary from -0.61 to -0.63 for monoamides and from -0.63 to -0.65 for carbamides. Carbon and nitrogen electronic charges vary between monoamides and carbamides but do not vary significantly when changing the alkyl groups. The molecular polarizability shows a notable increase, from 8.9 Å<sup>3</sup> for MMM to 15.9 Å<sup>3</sup> for PEE. This rise was expected, since the increase in polarizability is equal to expected addition of polarizability for -CH<sub>2</sub>- groups (≈ 1.8 Å<sup>3</sup> per group). As polarizability increases, the dispersion forces are expected to become stronger. Thus, molecules attract one another more strongly which stabilize further the complexes.

Table 1: Electronic atomic charges (NBO charges  $q_O$ ,  $q_N$  and  $q_C$ ), molecular polarizabilities ( $\alpha$ ) and proton affinity (PA) for the different amide ligands

| Charges | $q_O(e^-)$ | $q_N(e^-)$ | $q_C(e^-)$ | $\alpha(\text{Å}^3)$ | $PA(kJ.mol^{-1})$ |
|---------|------------|------------|------------|----------------------|-------------------|
| MMM     | -0.613     | -0.409     | 0.653      | 8.9                  | 0                 |
| MME     | -0.614     | -0.410     | 0.658      | 10.6                 | 8                 |
| EMM     | -0.617     | -0.411     | 0.652      | 10.6                 | 10                |
| EEM     | -0.618     | -0.413     | 0.657      | 12.3                 | 16                |
| MEE     | -0.621     | -0.415     | 0.657      | 12.3                 | 14                |
| EEE     | -0.625     | -0.414     | 0.659      | 14.1                 | 22                |
| PEE     | -0.623     | -0.413     | 0.662      | 15.9                 | 27                |
| IEE     | -0.628     | -0.415     | 0.665      | 15.8                 | 28                |
| C4M     | -0.631     | -0.441     | 0.761      | 11.8                 | 23                |
| C4E     | -0.652     | -0.445     | 0.778      | 18.9                 | 40                |

Intrinsic basicity has been evaluated through gas phase proton affinity and are reported in table 1. As mentioned, in the computational methods section, the energies are relative to the MMM protonation energy. For monoamides, the protonation energy shows an increase by substituting a methyl by an ethyl group, 10  $kJ.mol^{-1}$  in  $R_1$  position and 8  $kJ.mol^{-1}$  in  $R_2$  or  $R_3$  position. As expected, proton affinities tend to increase with oxygen electronic charge

and with the size of the alkyl chain. Same thing is observed for carbamides, the protonation affinity increased from 23 up to 40  $kJ.mol^{-1}$  by changing methyl with ethyl groups. As reported in literature, for organic molecules the proton affinities tend to increase with the size and polarizability of the alkyl substituent.[1] One can expect that the ligands' complexation ability will follow the same evolution as the protonation, more favorable as the alkyl chains become bulkier.

## 2 The structural parameters for geometry I

Table 2: Selected interatomic distances (average values  $d$  in Å)<sup>a</sup> and Hydrogen bond angle ( $\alpha_{O-H-O}$ ) calculated in  $[Pu(NO_3)_6](HL_2)$  in geometry I in the gas phase.

| Ligand | $d_{O_{Nit2}-O_L}$ | $d_{Pu-O_{Nit1}}$ | $d_{Pu-N_{Nit2}}$ | $d_{Pu-N_L}$ | $d_{Pu-C_{R1}}$ | $\alpha_{HOH}$ |
|--------|--------------------|-------------------|-------------------|--------------|-----------------|----------------|
| MMM    | 2.568              | 2.544             | 2.976             | 5.605        | 4.910           | 169.8          |
| MME    | 2.598              | 2.541             | 2.972             | 5.536        | 4.905           | 169.4          |
| EMM    | 2.603              | 2.526             | 2.992             | 5.411        | 5.176           | 165.3          |
| EEM    | 2.595              | 2.514             | 2.959             | 5.386        | 5.129           | 163.0          |
| MEE    | 2.566              | 2.544             | 2.978             | 5.720        | 4.897           | 170.1          |
| EEE    | 2.589              | 2.537             | 2.968             | 5.703        | 5.167           | 163.4          |
| PEE    | 2.594              | 2.537             | 2.974             | 5.839        | 5.122           | 163.4          |
| IEE    | 2.551              | 2.537             | 2.969             | 5.682        | 5.996           | 158.4          |
| C4M    | 2.592              | 2.529             | 2.957             | 5.427        | 5.793           | 171.8          |
| C4E    | 2.573              | 2.540             | 2.972             | 5.584        | 5.947           | 168.2          |

<sup>a</sup> $O_{Nit1}$  denotes oxygen from nitrate ions which are not involve in hydrogen bond.  $O_{Nit2}$  denotes oxygen from nitrate ions which are involved in hydrogen bond.

## 3 Optimized coordinates of inner-sphere complexes

| Pu-4NO3-2EEM |           |           | Pu-4NO3-2EEE |    |           | Pu-4NO3-2EME |           |    |           |           |           |
|--------------|-----------|-----------|--------------|----|-----------|--------------|-----------|----|-----------|-----------|-----------|
| Pu           | -0.01179  | 0.231195  | -0.151277    | Pu | -0.001133 | 0.306857     | 0.098261  | Pu | 0.001006  | 0.305512  | 0.133076  |
| C            | -3.341035 | -0.776687 | -0.215866    | C  | -3.405779 | -0.698359    | 0.372123  | C  | -3.47391  | -0.431739 | 0.38466   |
| C            | -5.683436 | -0.448386 | 0.450793     | C  | -5.804001 | -0.894264    | -0.116986 | C  | -5.843214 | -0.600961 | -0.224066 |
| H            | -5.788536 | -1.507412 | 0.222964     | H  | -5.74783  | -1.852386    | 0.398176  | H  | -5.909217 | -1.378688 | 0.530948  |
| C            | -3.435817 | -2.266971 | -0.058524    | C  | -3.548569 | -1.54017     | 1.607218  | C  | -3.717976 | -1.085752 | 1.714004  |
| C            | 5.63819   | -1.222689 | 0.335961     | C  | 5.703327  | -0.968617    | -0.205393 | C  | 5.622178  | -1.393401 | 0.00561   |
| H            | 6.122596  | -1.893406 | -0.378802    | H  | 6.130319  | -1.658748    | -0.937986 | C  | 3.445356  | -0.268324 | -0.105659 |
| C            | 3.468974  | -0.108663 | 0.020614     | C  | 3.459458  | 0.028238     | -0.251503 | C  | -4.21386  | 0.481016  | -1.728425 |
| C            | -4.211164 | 1.450096  | -0.200741    | C  | -4.288508 | 0.430561     | -1.571808 | H  | -3.397144 | 1.184514  | -1.579513 |
| H            | -3.642284 | 1.885001  | 0.622982     | H  | -3.513758 | 1.167529     | -1.369429 | C  | 3.525809  | -2.677949 | -0.216009 |
| C            | 3.60779   | -2.462739 | -0.388235    | C  | 3.682567  | -2.332112    | -0.687312 | C  | 4.075131  | 1.081016  | 0.080809  |
| C            | 4.018865  | 1.214316  | 0.465523     | H  | 2.71902   | -2.410826    | -0.18521  | N  | -4.472449 | -0.200696 | -0.45878  |
| N            | -4.387307 | 0.013656  | -0.022177    | C  | 4.005122  | 1.378582     | 0.110084  | N  | 4.179435  | -1.374605 | -0.101894 |
| N            | 4.220722  | -1.201602 | 0.002549     | N  | -4.457588 | -0.405229    | -0.381504 | N  | -0.009254 | 1.968713  | -2.301178 |
| N            | 0.033492  | 2.479168  | -2.033728    | N  | 4.257     | -1.025201    | -0.368565 | N  | 0.254394  | -0.36019  | 2.991849  |
| N            | -0.141737 | -1.217008 | 2.426302     | N  | -0.239803 | 2.297682     | -2.062128 | N  | -0.231675 | -2.410789 | -0.951046 |
| N            | 0.161826  | -2.048362 | -1.969079    | N  | 0.423211  | -0.728275    | 2.826964  | N  | 0.122099  | 2.966749  | 1.286671  |
| N            | -0.155152 | 2.465134  | 1.719124     | N  | -0.068114 | -2.241263    | -1.35339  | O  | 1.091103  | 2.142958  | 1.360585  |
| O            | 0.845422  | 1.681108  | 1.655905     | N  | -0.045724 | 2.776331     | 1.626932  | O  | 2.212347  | -0.357997 | -0.295132 |
| O            | 2.284669  | -0.183183 | -0.373407    | O  | 0.987838  | 2.035784     | 1.55209   | O  | -2.310727 | -0.114091 | 0.054226  |
| O            | -2.261041 | -0.269339 | -0.592733    | O  | 2.235563  | -0.100216    | -0.482654 | O  | -1.020125 | 1.301103  | -1.94232  |
| O            | -0.968857 | 1.718608  | -1.930163    | O  | -2.27391  | -0.287264    | 0.033409  | O  | -0.17114  | -1.384369 | -1.691469 |
| O            | 0.218016  | -0.846762 | -2.365725    | O  | -1.176813 | 1.497503     | -1.780811 | O  | -0.90265  | 2.518755  | 0.68103   |
| O            | -1.090569 | 2.189051  | 0.903656     | O  | -0.121161 | -1.120116    | -1.940975 | O  | -0.322613 | -3.519077 | -1.388897 |
| O            | 0.238965  | -2.97946  | -2.713168    | O  | -1.05482  | 2.335528     | 0.990661  | O  | 0.011256  | 2.654963  | -3.276233 |

|   |           |           |           |   |           |           |           |   |           |           |           |
|---|-----------|-----------|-----------|---|-----------|-----------|-----------|---|-----------|-----------|-----------|
| O | 0.081316  | 3.40766   | -2.779126 | O | -0.091503 | -3.281261 | -1.94148  | O | -0.790708 | 0.144984  | 2.4534    |
| O | -1.126454 | -0.601943 | 1.889932  | O | -0.315118 | 3.117848  | -2.924552 | O | -0.188068 | -2.173484 | 0.297264  |
| O | 0.01778   | -2.190778 | -0.712649 | O | -0.678855 | -0.241766 | 2.397263  | O | 0.999064  | 1.843923  | -1.53043  |
| O | 1.008126  | 2.168721  | -1.266082 | O | 0.012944  | -2.177734 | -0.085879 | O | 0.172865  | 4.062029  | 1.747108  |
| O | -0.210116 | 3.378971  | 2.479712  | O | 0.803685  | 2.151785  | -1.344534 | O | 0.308955  | -0.611786 | 4.156087  |
| O | -0.244731 | -1.79232  | 3.466746  | O | -0.064359 | 3.794068  | 2.242263  | O | 1.201558  | -0.568233 | 2.187331  |
| O | 0.927125  | -1.165105 | 1.761685  | O | 0.545867  | -1.13252  | 3.942306  | H | -6.256222 | -1.000506 | -1.151971 |
| H | -6.445201 | 0.071836  | -0.136364 | O | 1.349404  | -0.744817 | 1.972888  | H | -2.974654 | -0.666217 | 2.392769  |
| H | -2.43689  | -2.602108 | 0.220842  | H | -6.260109 | -1.097837 | -1.089275 | H | 3.331329  | 1.697154  | 0.588001  |
| H | 6.060475  | -0.234346 | 0.160564  | H | -5.230787 | 0.964158  | -1.716013 | H | -4.703799 | -0.828315 | 2.103018  |
| H | 3.207161  | 1.713332  | 0.998134  | H | -2.834017 | -1.138764 | 2.327146  | C | -3.539456 | -2.601896 | 1.635832  |
| C | -5.890896 | -0.192845 | 1.932546  | H | 4.342172  | -3.082395 | -0.245891 | H | -2.537865 | -2.855444 | 1.285158  |
| H | -5.147542 | -0.725698 | 2.529116  | H | 6.05906   | 0.023552  | -0.480202 | H | -3.670985 | -3.041078 | 2.62573   |
| H | -5.811241 | 0.870473  | 2.166667  | H | 3.247049  | 1.858659  | 0.731299  | H | -4.2639   | -3.06603  | 0.961832  |
| H | -6.884121 | -0.530484 | 2.235302  | C | -3.930848 | -0.375544 | -2.805593 | H | 4.944958  | 1.018012  | 0.735967  |
| C | 5.905194  | -1.681102 | 1.757609  | H | -4.682669 | -1.138978 | -3.022598 | C | 4.439336  | 1.721245  | -1.258801 |
| H | 5.490168  | -2.674409 | 1.939695  | H | -3.863493 | 0.288922  | -3.668798 | H | 5.177709  | 1.131281  | -1.807814 |
| H | 6.980516  | -1.72625  | 1.941727  | H | -2.960556 | -0.858292 | -2.683882 | H | 3.55089   | 1.831674  | -1.881258 |
| H | 5.46027   | -0.995102 | 2.48106   | C | -6.651666 | 0.092505  | 0.66501   | H | 4.858875  | 2.714041  | -1.09049  |
| H | -4.110303 | -2.538786 | 0.754136  | H | -6.232254 | 0.273449  | 1.656729  | C | -3.874163 | -0.479751 | -2.851314 |
| C | -3.853542 | -2.938764 | -1.365706 | H | -6.719885 | 1.052426  | 0.149421  | H | -5.115732 | 1.052615  | -1.962077 |
| H | -3.16417  | -2.680246 | -2.171092 | H | -7.664533 | -0.29675  | 0.787229  | H | 4.143424  | -3.386356 | 0.3416    |
| H | -3.840141 | -4.023097 | -1.248364 | C | 6.157226  | -1.339054 | 1.194804  | C | 3.35645   | -3.125602 | -1.655626 |
| H | -4.859177 | -2.643073 | -1.673962 | H | 5.813935  | -2.337487 | 1.472501  | H | 2.562029  | -2.615875 | 0.287813  |
| H | 4.84031   | 1.085852  | 1.170778  | H | 7.247741  | -1.329984 | 1.250119  | H | 6.052199  | -0.427369 | -0.241491 |
| C | 4.447888  | 2.066436  | -0.728667 | H | 5.769322  | -0.635413 | 1.93382   | H | 6.01972   | -2.125967 | -0.699351 |
| H | 5.255918  | 1.595615  | -1.294489 | C | 3.53679   | -2.557438 | -2.180704 | H | 5.934089  | -1.679745 | 1.014369  |
| H | 3.604538  | 2.23362   | -1.399226 | H | 3.120164  | -3.548973 | -2.367289 | H | -6.45233  | 0.253995  | 0.084217  |
| H | 4.801161  | 3.038168  | -0.380954 | H | 2.862199  | -1.821117 | -2.619629 | H | -3.740268 | 0.077602  | -3.779995 |
| H | -3.665685 | 1.645486  | -1.123183 | H | 4.500906  | -2.493676 | -2.691567 | H | -4.665927 | -1.216642 | -3.010161 |
| H | -5.194798 | 1.914529  | -0.24919  | H | -4.544789 | -1.445823 | 2.03944   | H | -2.940212 | -1.002679 | -2.641995 |
| H | 4.25777   | -3.276971 | -0.072353 | C | -3.215895 | -3.004673 | 1.32263   | H | 4.3178    | -3.198951 | -2.170359 |
| H | 3.47673   | -2.511554 | -1.472209 | H | -2.204525 | -3.101948 | 0.925383  | H | 2.720896  | -2.429705 | -2.205044 |
| H | 2.634556  | -2.574088 | 0.086798  | H | -3.273255 | -3.583031 | 2.245846  | H | 2.882859  | -4.108562 | -1.684912 |
|   |           |           |           | H | -3.909267 | -3.447569 | 0.603075  |   |           |           |           |
|   |           |           |           | H | 4.910709  | 1.291587  | 0.710666  |   |           |           |           |
|   |           |           |           | C | 4.254816  | 2.226555  | -1.137213 |   |           |           |           |
|   |           |           |           | H | 5.006173  | 1.776379  | -1.791182 |   |           |           |           |
|   |           |           |           | H | 3.331617  | 2.352999  | -1.703338 |   |           |           |           |
|   |           |           |           | H | 4.610671  | 3.215607  | -0.845386 |   |           |           |           |

## Pu-4NO3-2EMM

|    |           |           |           |
|----|-----------|-----------|-----------|
| Pu | 0.002342  | 0.158409  | -0.058752 |
| C  | -3.388351 | -0.571423 | -0.093514 |
| C  | -5.680239 | 0.054749  | 0.529469  |
| H  | -5.799794 | -0.993316 | 0.783005  |
| C  | -3.62345  | -2.021151 | 0.224278  |
| C  | 5.61149   | -1.506815 | 0.490246  |
| C  | 3.468782  | -0.352636 | 0.153276  |
| C  | -4.100249 | 1.71688   | -0.336516 |
| H  | -3.29193  | 1.774578  | -1.06082  |
| C  | 3.546512  | -2.757608 | 0.056771  |
| C  | 4.078226  | 0.993359  | 0.41747   |
| N  | -4.358134 | 0.328229  | 0.013636  |
| N  | 4.186088  | -1.467238 | 0.249752  |

## Pu-4NO3-2MEE

|    |           |           |           |
|----|-----------|-----------|-----------|
| Pu | -0.022837 | 0.143331  | 0.0027    |
| C  | -3.219048 | -1.186571 | -0.185638 |
| C  | -5.648029 | -1.153869 | 0.112379  |
| H  | -5.573855 | -2.238254 | 0.039412  |
| C  | -3.159643 | -2.581485 | 0.356607  |
| C  | 5.898249  | 0.110069  | 0.041116  |
| C  | 3.465341  | 0.409967  | 0.180265  |
| C  | -4.427059 | 0.805233  | -0.81862  |
| H  | -3.556176 | 1.348565  | -0.455006 |
| C  | 4.333553  | -1.795334 | -0.268501 |
| C  | 3.63211   | 1.86482   | 0.482605  |
| N  | -4.38149  | -0.558706 | -0.287052 |
| N  | 4.524929  | -0.372834 | 0.008967  |

## Pu-4NO3-2MEM

|    |           |           |           |
|----|-----------|-----------|-----------|
| Pu | -0.00866  | 0.162253  | -0.113876 |
| C  | -3.286615 | -0.963126 | -0.096134 |
| C  | -5.610039 | -0.722276 | 0.644203  |
| H  | -5.394473 | -1.603092 | 1.247479  |
| C  | -3.309371 | -2.425679 | 0.219531  |
| C  | 5.691268  | -0.589299 | 0.678607  |
| C  | 3.457193  | 0.197241  | 0.032316  |
| C  | -4.311133 | 1.204225  | -0.231713 |
| H  | -3.936486 | 1.771002  | 0.624164  |
| C  | 3.911895  | -2.14072  | -0.129244 |
| C  | 3.816199  | 1.615167  | 0.347175  |
| N  | -4.367213 | -0.216522 | 0.080047  |
| N  | 4.334678  | -0.783987 | 0.191608  |

|   |           |           |           |   |           |           |           |   |           |           |           |
|---|-----------|-----------|-----------|---|-----------|-----------|-----------|---|-----------|-----------|-----------|
| N | 0.242565  | 2.250444  | -2.103498 | N | 0.127949  | 1.961583  | -2.301281 | N | -0.144826 | 2.525306  | -1.850322 |
| N | -0.285059 | -1.075118 | 2.611467  | N | -0.343815 | -0.761927 | 2.784894  | N | 0.008155  | -1.438004 | 2.37972   |
| N | 0.052645  | -2.249509 | -1.709625 | N | 0.534521  | -2.431133 | -1.268165 | N | 0.29077   | -1.987635 | -2.060368 |
| N | -0.024956 | 2.536288  | 1.625485  | N | -0.611246 | 2.684243  | 1.305953  | N | -0.246975 | 2.26576   | 1.88574   |
| O | 0.92324   | 1.686848  | 1.645424  | O | 0.446852  | 2.018433  | 1.543984  | O | 0.802393  | 1.558308  | 1.751395  |
| O | 2.270103  | -0.429331 | -0.1879   | O | 2.321381  | -0.079673 | 0.072926  | O | 2.314162  | -0.082821 | -0.389324 |
| O | -2.268688 | -0.2173   | -0.523627 | O | -2.17407  | -0.616317 | -0.570958 | O | -2.24016  | -0.436788 | -0.532722 |
| O | -0.815029 | 1.575185  | -1.966304 | O | -0.819    | 1.140049  | -2.166731 | O | -1.08622  | 1.685594  | -1.791141 |
| O | 0.201507  | -1.084867 | -2.185938 | O | 0.557649  | -1.33485  | -1.903984 | O | 0.276487  | -0.761002 | -2.382758 |
| O | -0.963142 | 2.25761   | 0.814088  | O | -1.391108 | 2.142829  | 0.459779  | O | -1.184552 | 1.975806  | 1.076916  |
| O | 0.073539  | -3.232678 | -2.386145 | O | 0.774813  | -3.481631 | -1.782338 | O | 0.434465  | -2.863388 | -2.857658 |
| O | 0.371879  | 3.114805  | -2.913556 | O | 0.218654  | 2.71942   | -3.217143 | O | -0.176358 | 3.502592  | -2.530983 |
| O | -1.212121 | -0.433117 | 2.007214  | O | -1.309168 | -0.388636 | 2.029471  | O | -1.020978 | -0.848034 | 1.903115  |
| O | -0.119658 | -2.292827 | -0.448726 | O | 0.239047  | -2.326852 | -0.035164 | O | 0.141404  | -2.213775 | -0.816773 |
| O | 1.179047  | 1.927383  | -1.294514 | O | 0.999636  | 1.917578  | -1.365294 | O | 0.858325  | 2.238197  | -1.111917 |
| O | -0.03175  | 3.509171  | 2.310914  | O | -0.850396 | 3.724541  | 1.831461  | O | -0.342432 | 3.126678  | 2.702129  |
| O | -0.449475 | -1.561919 | 3.688086  | O | -0.523939 | -1.124563 | 3.906695  | O | -0.039858 | -2.085511 | 3.381398  |
| O | 0.797278  | -1.14874  | 1.970888  | O | 0.789477  | -0.716293 | 2.238709  | O | 1.057476  | -1.280116 | 1.701571  |
| H | -6.431346 | 0.321012  | -0.218603 | H | -2.116253 | -2.862315 | 0.475442  | C | -6.657651 | -1.034225 | -0.408937 |
| H | -2.638744 | -2.446461 | 0.415776  | H | 2.763542  | 2.201267  | 1.045876  | H | -2.44293  | -2.88707  | -0.249512 |
| H | 3.277765  | 1.60635   | 0.834465  | H | -3.666457 | -2.660736 | 1.318759  | H | 3.092384  | 2.26498   | -0.139312 |
| H | -4.205893 | -2.13312  | 1.140083  | H | 4.53843   | 2.089293  | 1.040429  | H | -3.21796  | -2.560605 | 1.300831  |
| C | -4.283393 | -2.755216 | -0.941421 | C | -4.480733 | 0.835692  | -2.334132 | H | 3.746722  | 1.778955  | 1.426228  |
| H | -3.682656 | -2.659455 | -1.847601 | H | -5.312155 | 1.278533  | -0.388564 | H | -3.64474  | 1.37732   | -1.073893 |
| H | -4.372259 | -3.817442 | -0.709693 | H | 5.184828  | -2.321597 | 0.169943  | H | -5.314739 | 1.546515  | -0.481809 |
| H | -5.283116 | -2.371367 | -1.156614 | C | 4.223854  | -2.091623 | -1.752702 | H | 4.739254  | -2.817861 | 0.074173  |
| H | 4.862747  | 0.929006  | 1.172427  | H | 3.437992  | -2.123349 | 0.257762  | H | 3.632902  | -2.221923 | -1.180784 |
| C | 4.599126  | 1.636529  | -0.867311 | H | 5.92262   | 1.149491  | -0.284424 | H | 3.050767  | -2.420856 | 0.478479  |
| H | 5.397241  | 1.047406  | -1.326048 | C | 6.55478   | -0.048935 | 1.400538  | H | 5.738667  | 0.351901  | 1.223707  |
| H | 3.790336  | 1.749848  | -1.589665 | C | -6.079909 | -0.740805 | 1.508367  | C | 6.728076  | -0.623193 | -0.429317 |
| H | 4.995679  | 2.628853  | -0.648322 | H | -4.569582 | 1.868084  | -2.677445 | H | 5.887527  | -1.378407 | 1.409402  |
| H | -5.009599 | 2.141113  | -0.763682 | H | -5.338828 | 0.277054  | -2.717011 | H | -5.979065 | 0.040959  | 1.334447  |
| H | -3.815997 | 2.29019   | 0.549157  | H | -3.566302 | 0.421185  | -2.759204 | H | -4.219955 | -2.917946 | -0.120784 |
| H | 4.041175  | -3.487286 | 0.698869  | H | 5.120267  | -1.775851 | -2.292263 | H | 4.821097  | 1.876338  | 0.017236  |
| H | 3.63398   | -3.084431 | -0.983278 | H | 3.360899  | -1.585793 | -2.187913 | H | 6.566134  | 0.18642   | -1.144137 |
| H | 2.495093  | -2.696858 | 0.325334  | H | 4.097973  | -3.164642 | -1.908632 | H | 6.694344  | -1.56778  | -0.976131 |
| H | 6.054169  | -0.518688 | 0.41597   | H | 3.643326  | 2.420751  | -0.459311 | H | 7.730003  | -0.513961 | -0.009417 |
| H | 6.083004  | -2.146823 | -0.25953  | H | -3.632256 | -3.280254 | -0.338808 | H | -6.319388 | -1.826806 | -1.079564 |
| H | 5.822743  | -1.922173 | 1.479698  | H | 6.543936  | -1.090903 | 1.726507  | H | -6.887663 | -0.155934 | -1.015274 |
| H | -5.859354 | 0.655191  | 1.425551  | H | 6.041969  | 0.544748  | 2.159891  | H | -7.582636 | -1.362917 | 0.068981  |
|   |           |           |           | H | 7.595456  | 0.278582  | 1.355504  |   |           |           |           |
|   |           |           |           | H | 6.449454  | -0.457041 | -0.713356 |   |           |           |           |
|   |           |           |           | H | -6.177014 | 0.343429  | 1.589902  |   |           |           |           |
|   |           |           |           | H | -5.357591 | -1.068727 | 2.258319  |   |           |           |           |
|   |           |           |           | H | -7.048819 | -1.184266 | 1.746725  |   |           |           |           |
|   |           |           |           | H | -6.394026 | -0.844189 | -0.624559 |   |           |           |           |

| Pu-4NO3-2MME |           |           | Pu-4NO3-2MMM |    |           | Pu-4NO3-2PEE |           |   |           |           |           |
|--------------|-----------|-----------|--------------|----|-----------|--------------|-----------|---|-----------|-----------|-----------|
| Pu           | -0.013094 | 0.133229  | 0.099292     | Pu | -0.034034 | 0.196499     | -0.301316 | C | -3.792925 | 0.874782  | -3.022861 |
| C            | -3.197462 | -1.25818  | 0.035194     | C  | -3.278437 | -0.972233    | -0.097764 | C | -4.090197 | 1.430917  | -1.643348 |
| C            | -5.640134 | -1.238316 | 0.180455     | C  | -5.523443 | -0.71553     | 0.844428  | N | -4.460916 | 0.390547  | -0.682417 |
| H            | -5.531733 | -2.249704 | 0.560352     | H  | -5.4048   | -1.750624    | 1.148924  | C | -5.878013 | 0.063938  | -0.596133 |
| C            | -3.130803 | -2.538367 | 0.809783     | C  | -3.275947 | -2.437872    | 0.208493  | C | -6.639026 | 0.964282  | 0.359886  |
| C            | 5.891334  | 0.232498  | -0.046079    | C  | 5.557911  | -0.466403    | 0.729659  | C | -3.521965 | -0.211755 | 0.036575  |
| C            | 3.469372  | 0.487589  | 0.19236      | C  | 3.408915  | 0.255537     | -0.196194 | O | -2.320436 | 0.083753  | -0.150414 |

|   |           |           |           |   |           |           |           |    |           |           |           |
|---|-----------|-----------|-----------|---|-----------|-----------|-----------|----|-----------|-----------|-----------|
| C | -4.413212 | 0.578612  | -0.957156 | C | -4.336708 | 1.19311   | -0.141327 | C  | -3.872875 | -1.262132 | 1.047242  |
| H | -3.556804 | 1.181253  | -0.658521 | H | -3.618929 | 1.398986  | -0.931043 | C  | -3.669968 | -2.671792 | 0.483775  |
| C | 4.390406  | -1.731052 | -0.07729  | C | 3.878589  | -2.105561 | 0.052882  | Pu | 0.002032  | 0.252697  | 0.158411  |
| C | 3.624525  | 1.965061  | 0.368721  | C | 3.805108  | 1.694641  | -0.069578 | O  | 2.192033  | -0.183459 | -0.558547 |
| N | -4.366193 | -0.686788 | -0.22115  | N | -4.343394 | -0.227572 | 0.167877  | C  | 3.411551  | -0.282799 | -0.287936 |
| N | 4.541708  | -0.281778 | 0.034713  | N | 4.251908  | -0.707117 | 0.159247  | N  | 4.085849  | -1.343194 | -0.711308 |
| N | 0.124377  | 1.660828  | -2.409826 | N | -0.280355 | 2.532659  | -2.056857 | C  | 3.379071  | -2.4111   | -1.418524 |
| N | -0.321252 | -0.432303 | 2.96721   | N | 0.072222  | -1.35189  | 2.226068  | C  | 3.283269  | -2.157005 | -2.911331 |
| N | 0.588984  | -2.567222 | -0.849718 | N | 0.188467  | -1.962136 | -2.247741 | C  | 4.089594  | 0.820962  | 0.466443  |
| N | -0.662062 | 2.801339  | 1.073577  | N | -0.177876 | 2.330823  | 1.674714  | C  | 4.512763  | 1.961052  | -0.465285 |
| O | 0.409942  | 2.194711  | 1.394377  | O | 0.864861  | 1.621681  | 1.497709  | C  | 5.518111  | -1.522235 | -0.516772 |
| O | 2.337509  | -0.037899 | 0.193145  | O | 2.28132   | -0.036899 | -0.649648 | C  | 5.849784  | -2.352517 | 0.709785  |
| O | -2.150232 | -0.72233  | -0.388267 | O | -2.272886 | -0.446495 | -0.621763 | O  | -0.847958 | 1.857876  | 1.805736  |
| O | -0.810389 | 0.846166  | -2.181755 | O | -1.214254 | 1.691467  | -1.931032 | N  | 0.173028  | 1.869606  | 2.564814  |
| O | 0.596268  | -1.555835 | -1.614153 | O | 0.147256  | -0.737299 | -2.573852 | O  | 0.243777  | 2.547465  | 3.539885  |
| O | -1.426557 | 2.140215  | 0.301283  | O | -1.154421 | 2.028736  | 0.919127  | O  | 1.1127    | 1.093796  | 2.19597   |
| O | 0.851785  | -3.667528 | -1.231669 | O | 0.271457  | -2.842208 | -3.047392 | O  | -0.853973 | -1.099146 | 2.018721  |
| O | 0.210329  | 2.302831  | -3.410803 | O | -0.355156 | 3.50127   | -2.745676 | N  | 0.158474  | -1.855743 | 2.216638  |
| O | -1.292875 | -0.174035 | 2.172538  | O | -0.973015 | -0.770002 | 1.775517  | O  | 1.129288  | -1.633476 | 1.446971  |
| O | 0.283771  | -2.319459 | 0.36001   | O | 0.135337  | -2.180806 | -0.993178 | O  | 0.162156  | -2.699786 | 3.060099  |
| O | 0.989317  | 1.745756  | -1.470462 | O | 0.766118  | 2.255878  | -1.376356 | O  | 1.113924  | 2.416785  | -0.357523 |
| O | -0.926328 | 3.893565  | 1.463722  | O | -0.232006 | 3.203269  | 2.482475  | N  | 0.153469  | 2.966502  | -0.987599 |
| O | -0.495186 | -0.658952 | 4.124721  | O | 0.062161  | -1.971736 | 3.246495  | O  | 0.22651   | 4.069398  | -1.435515 |
| O | 0.81196   | -0.429976 | 2.417988  | O | 1.093765  | -1.218105 | 1.502728  | O  | -0.876028 | 2.239625  | -1.098264 |
| H | -2.086676 | -2.818596 | 0.922761  | H | -6.39571  | -0.633862 | 0.190103  | O  | -0.310202 | -1.942228 | -0.969643 |
| H | 2.698181  | 2.368504  | 0.770387  | H | -2.376945 | -2.871157 | -0.223732 | N  | -0.325359 | -1.506607 | -2.16412  |
| H | -3.575672 | -2.417552 | 1.799145  | H | 3.052729  | 2.298587  | -0.570294 | O  | -0.457277 | -2.22868  | -3.106985 |
| H | 4.449594  | 2.215062  | 1.035216  | H | -3.246863 | -2.593111 | 1.289652  | O  | -0.190121 | -0.251675 | -2.275488 |
| C | -4.425449 | 0.378521  | -2.460405 | H | 3.836457  | 1.985188  | 0.983565  | H  | -5.992739 | -0.983605 | -0.319989 |
| H | -5.315715 | 1.096177  | -0.623786 | H | -5.337264 | 1.481947  | -0.466341 | H  | 5.901088  | -2.006831 | -1.418886 |
| H | 5.265126  | -2.176495 | 0.403928  | H | -4.062094 | 1.776025  | 0.74137   | H  | -3.223216 | 1.964027  | -1.257928 |
| C | 4.266707  | -2.199526 | -1.514998 | H | 3.740202  | -2.529597 | 1.049932  | H  | 2.388877  | -2.513924 | -0.976354 |
| H | 3.512916  | -2.020394 | 0.49942   | H | 4.673394  | -2.649168 | -0.462906 | H  | -6.282788 | 0.157801  | -1.607059 |
| H | 5.899112  | 1.279597  | -0.336029 | H | 2.947957  | -2.201285 | -0.496457 | H  | -4.926074 | 2.133591  | -1.681577 |
| H | 6.413942  | 0.119866  | 0.908885  | H | 5.722734  | 0.590414  | 0.912548  | H  | -3.189199 | -1.118612 | 1.885595  |
| H | -6.094868 | -0.617153 | 0.957284  | H | 6.338863  | -0.839277 | 0.060714  | H  | 3.923699  | -3.336279 | -1.21805  |
| H | -4.519226 | 1.345374  | -2.958178 | H | 5.638777  | -0.997484 | 1.681374  | H  | 5.999782  | -0.546468 | -0.468217 |
| H | -5.264106 | -0.246631 | -2.777791 | H | -5.705348 | -0.112618 | 1.737777  | H  | 3.359085  | 1.197362  | 1.18574   |
| H | -3.493122 | -0.077909 | -2.793879 | H | -4.1543   | -2.943534 | -0.194847 | H  | -4.638608 | 0.31015   | -3.424091 |
| H | 5.142019  | -1.920233 | -2.106734 | H | 4.781424  | 1.889785  | -0.514677 | H  | -3.5796   | 1.69588   | -3.709714 |
| H | 3.378771  | -1.776186 | -1.98663  |   |           |           |           | H  | -2.916031 | 0.226963  | -2.999396 |
| H | 4.175665  | -3.286853 | -1.543583 |   |           |           |           | H  | -6.27564  | 0.849968  | 1.383094  |
| H | 3.802221  | 2.434714  | -0.602612 |   |           |           |           | H  | -6.535008 | 2.015065  | 0.082351  |
| H | -3.658047 | -3.341153 | 0.289426  |   |           |           |           | H  | -7.702198 | 0.715639  | 0.344156  |
| H | -6.313885 | -1.264495 | -0.679106 |   |           |           |           | H  | 5.37835   | -3.336061 | 0.663195  |
| H | 6.438022  | -0.32811  | -0.805958 |   |           |           |           | H  | 6.929419  | -2.499024 | 0.782596  |
|   |           |           |           |   |           |           |           | H  | 5.506701  | -1.861128 | 1.622209  |
|   |           |           |           |   |           |           |           | H  | 2.760988  | -2.984101 | -3.395792 |
|   |           |           |           |   |           |           |           | H  | 2.724874  | -1.241981 | -3.113588 |
|   |           |           |           |   |           |           |           | H  | 4.272515  | -2.067852 | -3.367438 |
|   |           |           |           |   |           |           |           | H  | -4.890125 | -1.143033 | 1.422144  |
|   |           |           |           |   |           |           |           | H  | -2.660616 | -2.743475 | 0.070168  |
|   |           |           |           |   |           |           |           | C  | -3.869173 | -3.734666 | 1.549533  |
|   |           |           |           |   |           |           |           | H  | -4.360703 | -2.840623 | -0.350311 |
|   |           |           |           |   |           |           |           | H  | 4.945604  | 0.45317   | 1.034583  |

|   |           |           |           |
|---|-----------|-----------|-----------|
| H | 5.235341  | 1.59061   | -1.201434 |
| H | 3.634927  | 2.297634  | -1.021413 |
| C | 5.108201  | 3.12382   | 0.308061  |
| H | -3.727496 | -4.734408 | 1.134286  |
| H | -3.152544 | -3.606037 | 2.364273  |
| H | -4.875124 | -3.690426 | 1.976814  |
| H | 5.404208  | 3.929512  | -0.366551 |
| H | 4.381998  | 3.531592  | 1.014982  |
| H | 5.993124  | 2.819132  | 0.874196  |

| Pu-4NO <sub>3</sub> -2IEE |           |           | Pu-4NO <sub>3</sub> -2C4E |    |           | Pu-4NO <sub>3</sub> -2C4M |           |    |           |           |           |
|---------------------------|-----------|-----------|---------------------------|----|-----------|---------------------------|-----------|----|-----------|-----------|-----------|
| Pu                        | -0.012298 | 0.244985  | 0.0528                    | Pu | -0.000603 | 0.098493                  | 0.259103  | Pu | 0.015438  | -0.041705 | 0.178012  |
| C                         | -3.415975 | -0.821093 | -0.243049                 | N  | 1.1284    | -1.940804                 | -1.588875 | N  | 0.990999  | -1.374387 | -2.285412 |
| C                         | -5.798074 | -0.270131 | 0.021685                  | N  | -0.543403 | 1.134241                  | 2.928778  | N  | -0.4282   | 0.112186  | 3.056563  |
| H                         | -5.969563 | -0.699604 | -0.964915                 | N  | -0.562577 | -2.365973                 | 1.74731   | N  | -0.412118 | -2.868944 | 0.815806  |
| C                         | -3.752331 | -2.09061  | -0.991398                 | N  | -0.178098 | 2.730259                  | -1.026779 | N  | -0.22165  | 2.847605  | -0.257034 |
| C                         | 5.690248  | -1.248474 | 0.366017                  | O  | -0.343662 | 2.550129                  | 0.219827  | O  | -0.348726 | 2.30382   | 0.882191  |
| H                         | 5.86613   | -2.23484  | 0.800457                  | O  | 0.291118  | -1.050173                 | -1.937984 | O  | 0.072733  | -0.497646 | -2.275855 |
| C                         | 3.539006  | -0.223232 | -0.282221                 | O  | -1.213342 | -1.980032                 | 0.716633  | O  | -1.116654 | -2.208196 | -0.018894 |
| C                         | -4.046492 | 1.189738  | 0.96992                   | O  | 0.07942   | 1.678095                  | -1.682243 | O  | 0.047593  | 2.045355  | -1.200645 |
| H                         | -3.068944 | 1.060776  | 1.426338                  | O  | -0.815139 | -3.385457                 | 2.310338  | O  | -0.602706 | -4.024243 | 1.036086  |
| C                         | 3.64329   | -1.626972 | 1.69118                   | O  | 1.572169  | -2.741461                 | -2.357938 | O  | 1.356446  | -1.914825 | -3.285944 |
| H                         | 2.800195  | -1.021757 | 2.012897                  | O  | -1.439063 | 0.630969                  | 2.167458  | O  | -1.347529 | -0.145229 | 2.20406   |
| C                         | 4.191444  | 0.537772  | -1.41261                  | O  | 0.352623  | -1.577962                 | 2.112934  | O  | 0.49372   | -2.194742 | 1.384977  |
| N                         | -4.371852 | -0.024577 | 0.216562                  | O  | 1.457111  | -1.904779                 | -0.367804 | O  | 1.492897  | -1.6228   | -1.148036 |
| N                         | 4.264479  | -0.982522 | 0.53261                   | O  | -0.258538 | 3.807782                  | -1.536498 | O  | -0.348841 | 4.024099  | -0.425765 |
| N                         | -0.345049 | 2.184317  | -2.1119                   | O  | -0.792328 | 1.541374                  | 4.01994   | O  | -0.642777 | 0.157653  | 4.226829  |
| N                         | -0.340146 | -0.723647 | 2.839014                  | O  | 0.614405  | 1.162237                  | 2.423795  | O  | 0.710409  | 0.315196  | 2.548699  |
| N                         | 0.388071  | -2.018674 | -1.792197                 | C  | -4.557557 | -2.166629                 | -0.227646 | C  | -5.211791 | -1.336832 | -1.101623 |
| N                         | 0.193368  | 2.736262  | 1.542964                  | H  | -4.901445 | -1.608072                 | 0.641087  | H  | -5.610847 | -0.970164 | -0.158905 |
| O                         | 1.114532  | 1.854589  | 1.502393                  | C  | -3.376691 | -0.051299                 | -0.588476 | C  | -3.422553 | 0.275635  | -0.634509 |
| O                         | 2.304825  | -0.112754 | -0.105502                 | C  | -2.892768 | -1.927462                 | -2.032768 | C  | -3.120364 | -1.393619 | -2.36551  |
| O                         | -2.207611 | -0.540272 | -0.075247                 | H  | -3.341663 | -2.903112                 | -2.224752 | H  | -3.722857 | -1.623932 | -3.247376 |
| O                         | -1.30557  | 1.463403  | -1.719383                 | N  | -3.777746 | -1.263097                 | -1.075071 | N  | -3.955105 | -0.69019  | -1.411698 |
| O                         | 0.224737  | -0.821612 | -2.181356                 | O  | -2.168038 | 0.301215                  | -0.652094 | O  | -2.180081 | 0.391919  | -0.508444 |
| O                         | -0.826108 | 2.463239  | 0.839912                  | H  | -1.914125 | -2.114941                 | -1.589399 | H  | -2.733522 | -2.324116 | -1.941623 |
| O                         | 0.588603  | -2.920366 | -2.550599                 | H  | -3.869708 | -2.928189                 | 0.159034  | H  | -5.035272 | -2.411388 | -0.998171 |
| O                         | -0.445365 | 2.9955    | -2.978558                 | C  | -2.755943 | -1.171662                 | -3.337994 | C  | -5.514487 | 1.559293  | -0.570939 |
| O                         | -1.065271 | 0.198604  | 2.369036                  | H  | -2.112597 | -1.732744                 | -4.018185 | H  | -5.654604 | 1.134476  | -1.562074 |
| O                         | 0.314669  | -2.180203 | -0.5373                   | H  | -3.729435 | -1.033505                 | -3.814662 | C  | -3.726218 | 1.99205   | 1.041022  |
| O                         | 0.755625  | 1.970502  | -1.500266                 | H  | -2.293595 | -0.195566                 | -3.187825 | H  | -2.935586 | 1.483228  | 1.584531  |
| O                         | 0.290893  | 3.733857  | 2.185041                  | C  | -5.715743 | 0.696797                  | -0.366324 | N  | -4.250103 | 1.138193  | -0.007294 |
| O                         | -0.445673 | -1.133043 | 3.955435                  | H  | -5.866617 | -0.120531                 | -1.067575 | H  | -4.537363 | 2.220864  | 1.734865  |
| O                         | 0.515157  | -1.186675 | 2.018749                  | C  | -3.844388 | 2.084204                  | 0.44648   | H  | -5.510783 | 2.649056  | -0.6672   |
| H                         | -6.276915 | 0.710713  | 0.008452                  | H  | -2.892069 | 1.93459                   | 0.945941  | C  | 5.139198  | -1.252424 | -0.330933 |
| H                         | -4.772905 | 1.254533  | 1.784851                  | N  | -4.290271 | 0.800743                  | -0.092569 | H  | 5.251731  | -0.819065 | -1.321511 |
| H                         | 4.387723  | -1.611955 | 2.491731                  | H  | -4.561268 | 2.375799                  | 1.217032  | C  | 3.454202  | 0.509175  | -0.072065 |
| H                         | 5.930387  | -1.341776 | -0.69266                  | H  | -6.012264 | 1.612894                  | -0.888626 | C  | 3.581431  | -1.279711 | 1.550251  |
| C                         | -4.087432 | 2.440386  | 0.113118                  | C  | -3.730699 | 3.167446                  | -0.611504 | H  | 4.410041  | -1.646923 | 2.159942  |
| H                         | -5.079853 | 2.610533  | -0.312445                 | H  | -3.346481 | 4.083472                  | -0.15942  | N  | 4.131896  | -0.542349 | 0.429622  |
| H                         | -3.83009  | 3.305565  | 0.726048                  | H  | -3.040084 | 2.870679                  | -1.401557 | O  | 2.24526   | 0.702459  | 0.215931  |
| H                         | -3.363223 | 2.379182  | -0.699466                 | H  | -4.695225 | 3.400959                  | -1.068802 | H  | 2.984274  | -2.132013 | 1.215808  |
| C                         | -6.408398 | -1.131523 | 1.11177                   | C  | 4.762857  | -1.685691                 | 0.550652  | H  | 4.81447   | -2.289338 | -0.455257 |
| H                         | -5.978886 | -2.135381 | 1.113629                  | H  | 4.793352  | -1.799508                 | -0.530508 | C  | 5.515084  | 1.656426  | -0.757157 |
| H                         | -6.242899 | -0.693328 | 2.09801                   | C  | 3.423695  | 0.268307                  | -0.096327 | H  | 5.937249  | 1.13715   | 0.099827  |

|   |           |           |           |   |           |           |           |   |           |           |           |
|---|-----------|-----------|-----------|---|-----------|-----------|-----------|---|-----------|-----------|-----------|
| H | -7.485885 | -1.222176 | 0.959274  | C | 3.586743  | -0.319348 | 2.240358  | C | 3.34427   | 2.357228  | -1.63211  |
| C | 6.577127  | -0.2186   | 1.04045   | H | 4.120078  | -1.078848 | 2.8133    | H | 2.33647   | 2.001673  | -1.824633 |
| H | 6.337783  | -0.128553 | 2.102047  | N | 4.079366  | -0.431798 | 0.865462  | N | 4.099731  | 1.381152  | -0.873887 |
| H | 7.625437  | -0.512215 | 0.954211  | O | 2.26544   | 0.725686  | 0.122024  | H | 3.850339  | 2.52916   | -2.584446 |
| H | 6.460399  | 0.766083  | 0.584194  | H | 2.529076  | -0.580839 | 2.296825  | H | 5.651809  | 2.731112  | -0.605237 |
| C | 3.189331  | -3.044859 | 1.404581  | H | 4.127871  | -2.501344 | 0.91564   | H | 3.276809  | 3.30918   | -1.09493  |
| H | 2.77028   | -3.480839 | 2.313044  | C | 3.839289  | 1.045718  | 2.84557   | H | 6.065269  | 1.368161  | -1.657947 |
| H | 2.409677  | -3.055721 | 0.642299  | H | 3.464217  | 1.068844  | 3.870192  | H | 6.108611  | -1.25119  | 0.176425  |
| H | 4.017553  | -3.67788  | 1.074771  | H | 4.907587  | 1.27497   | 2.859431  | H | 2.958108  | -0.631725 | 2.161819  |
| H | -4.820181 | -2.290865 | -0.90791  | H | 3.315576  | 1.82674   | 2.294077  | H | -2.27946  | -0.773141 | -2.663011 |
| C | -3.40996  | -1.899666 | -2.469248 | C | 5.459052  | 0.512012  | -1.471934 | H | -3.334047 | 2.930771  | 0.636415  |
| H | -2.355654 | -1.652723 | -2.601341 | H | 5.928951  | 0.29996   | -0.514653 | H | -6.360623 | 1.276956  | 0.062831  |
| H | -3.617376 | -2.821073 | -3.01657  | C | 3.247535  | 1.202578  | -2.318041 | H | -5.95608  | -1.187231 | -1.890004 |
| H | -3.997071 | -1.095459 | -2.919219 | H | 2.226151  | 0.830509  | -2.304874 |   |           |           |           |
| H | 5.251655  | 0.289006  | -1.446927 | N | 4.015994  | 0.52023   | -1.278324 |   |           |           |           |
| C | 3.561193  | 0.154262  | -2.74813  | H | 3.678782  | 0.90789   | -3.276849 |   |           |           |           |
| H | 3.659452  | -0.914981 | -2.951708 | H | 5.755149  | 1.532252  | -1.740557 |   |           |           |           |
| H | 2.502404  | 0.410379  | -2.768353 | C | 3.248938  | 2.714213  | -2.17682  |   |           |           |           |
| H | 4.058742  | 0.698526  | -3.553365 | H | 2.629437  | 3.156352  | -2.958945 |   |           |           |           |
| C | -3.009309 | -3.272383 | -0.375496 | H | 2.835729  | 3.013134  | -1.21297  |   |           |           |           |
| H | -3.284234 | -3.414514 | 0.672546  | H | 4.253722  | 3.133993  | -2.267431 |   |           |           |           |
| H | -3.266581 | -4.183917 | -0.918552 | C | 6.151212  | -1.811961 | 1.147288  |   |           |           |           |
| H | -1.929016 | -3.136967 | -0.42464  | H | 6.132904  | -1.713932 | 2.234488  |   |           |           |           |
| C | 4.075317  | 2.038786  | -1.141048 | H | 6.560255  | -2.797625 | 0.914567  |   |           |           |           |
| H | 3.034359  | 2.358289  | -1.149069 | H | 6.840509  | -1.060118 | 0.757393  |   |           |           |           |
| H | 4.514279  | 2.311823  | -0.178554 | C | 5.951377  | -0.441661 | -2.546623 |   |           |           |           |
| H | 4.605254  | 2.585828  | -1.923671 | H | 7.037722  | -0.364765 | -2.629497 |   |           |           |           |
|   |           |           |           | H | 5.701017  | -1.480515 | -2.326783 |   |           |           |           |
|   |           |           |           | H | 5.531764  | -0.199956 | -3.524609 |   |           |           |           |
|   |           |           |           | C | -5.72524  | -2.834988 | -0.927013 |   |           |           |           |
|   |           |           |           | H | -5.400973 | -3.406699 | -1.798672 |   |           |           |           |
|   |           |           |           | H | -6.210111 | -3.533253 | -0.241054 |   |           |           |           |
|   |           |           |           | H | -6.475123 | -2.114748 | -1.260529 |   |           |           |           |
|   |           |           |           | C | -6.587786 | 0.530184  | 0.866193  |   |           |           |           |
|   |           |           |           | H | -7.637553 | 0.497418  | 0.5663    |   |           |           |           |
|   |           |           |           | H | -6.363705 | -0.387569 | 1.411698  |   |           |           |           |
|   |           |           |           | H | -6.47151  | 1.365409  | 1.558972  |   |           |           |           |

## 4 Optimized coordinates of outer-sphere complexes

### 4.1 Geometry I

| Pu-6NO3-2HL-GEOM1 MMM |           |           | Pu-6NO3-2HL-GEOM1_MME |    |           | Pu-6NO3-2HL-GEOM1 MEM |           |    |           |           |           |
|-----------------------|-----------|-----------|-----------------------|----|-----------|-----------------------|-----------|----|-----------|-----------|-----------|
| Pu                    | -0.01093  | -0.440413 | -0.09975              | Pu | -0.003507 | -0.005158             | 0.015877  | Pu | 0.015545  | -0.430533 | 0.098079  |
| O                     | 0.647886  | 2.006422  | -0.268346             | O  | -0.212513 | 1.15404               | 2.221685  | O  | -0.750615 | 1.980351  | -0.067452 |
| O                     | 1.750071  | 0.699701  | -1.541141             | O  | 1.172688  | 2.035375              | 0.860248  | O  | -1.838729 | 0.795092  | 1.330186  |
| O                     | 2.27306   | 2.793948  | -1.451515             | O  | 0.932433  | 2.881317              | 2.833775  | O  | -2.455983 | 2.830297  | 0.948229  |
| O                     | 0.335082  | -1.734937 | -2.152414             | O  | 0.761456  | 1.592479              | -1.922111 | O  | -0.349544 | -1.46823  | 2.292254  |
| O                     | 2.046167  | -2.984365 | -2.580327             | O  | 2.824808  | 1.841519              | -2.514893 | O  | -2.027545 | -2.718605 | 2.832967  |
| O                     | 1.868013  | -1.956565 | -0.686974             | O  | 2.260962  | 0.360965              | -1.05159  | O  | -1.821084 | -1.944855 | 0.824911  |
| O                     | -1.087386 | 0.683789  | -2.036644             | O  | -1.452999 | 2.059631              | -0.138986 | O  | 0.988271  | 0.971205  | 1.90024   |
| O                     | -3.079188 | 0.304755  | -2.780581             | O  | -3.200367 | 2.285758              | -1.389161 | O  | 2.972054  | 0.778015  | 2.732475  |
| O                     | -2.245672 | -0.88677  | -1.181661             | O  | -1.966317 | 0.515766              | -1.512595 | O  | 2.230874  | -0.646888 | 1.286049  |
| N                     | 1.57768   | 1.871559  | -1.101706             | N  | 0.638558  | 2.062232              | 2.014222  | N  | -1.705582 | 1.90828   | 0.746103  |
| N                     | 1.442479  | -2.265017 | -1.845296             | N  | 1.951402  | 1.278357              | -1.851758 | N  | -1.424894 | -2.078762 | 2.026702  |

|   |           |           |           |   |           |           |           |   |           |           |           |
|---|-----------|-----------|-----------|---|-----------|-----------|-----------|---|-----------|-----------|-----------|
| N | -2.171123 | 0.0422    | -2.035103 | N | -2.241431 | 1.652868  | -1.028334 | N | 2.097058  | 0.381736  | 2.0082    |
| O | -0.637876 | -2.826331 | 0.256344  | O | 0.209486  | -1.164066 | -2.194212 | O | 0.749685  | -2.81897  | 0.076016  |
| O | -1.648361 | -1.424873 | 1.503012  | O | -1.179337 | -2.045728 | -0.836833 | O | 1.742551  | -1.54878  | -1.316502 |
| O | -2.152441 | -3.522703 | 1.632805  | O | -0.936393 | -2.88857  | -2.811632 | O | 2.344887  | -3.61771  | -1.144709 |
| O | -0.394412 | 1.003839  | 2.17163   | O | -0.771567 | -1.613731 | 1.947924  | O | 0.424006  | 0.717346  | -2.334276 |
| O | -2.210703 | 2.117747  | 2.527393  | O | -2.839305 | -1.862455 | 2.526914  | O | 2.214999  | 1.844051  | -2.77205  |
| O | -1.853994 | 1.160021  | 0.629351  | O | -2.262339 | -0.368642 | 1.082483  | O | 1.813751  | 1.134946  | -0.776531 |
| O | 1.175346  | -1.492867 | 2.087785  | O | 1.446287  | -2.071658 | 0.159643  | O | -1.061805 | -1.818761 | -1.966445 |
| O | 3.154317  | -0.899443 | 2.721084  | O | 3.19448   | -2.298962 | 1.407965  | O | -3.043128 | -1.387215 | -2.714886 |
| O | 2.147415  | 0.129707  | 1.115328  | O | 1.95368   | -0.534696 | 1.543008  | O | -2.112938 | -0.118274 | -1.240633 |
| N | -1.505928 | -2.641115 | 1.152479  | N | -0.642578 | -2.071126 | -1.990507 | N | 1.641135  | -2.713359 | -0.808042 |
| N | -1.479173 | 1.438247  | 1.794772  | N | -1.960534 | -1.29604  | 1.875115  | N | 1.477851  | 1.24088   | -1.982275 |
| N | 2.161167  | -0.766502 | 1.996797  | N | 2.232198  | -1.666451 | 1.051607  | N | -2.073938 | -1.12403  | -1.994788 |
| H | 4.257863  | 0.076188  | 2.203581  | H | 4.235384  | 1.290599  | -2.011991 | H | -4.195819 | -0.388752 | -2.349447 |
| H | -3.556922 | 2.329765  | 1.784315  | H | -4.250414 | -1.297701 | 2.025528  | H | 3.536025  | 2.195104  | -2.014875 |
| O | 4.843343  | 0.790215  | 1.770007  | O | 5.015754  | 0.79831   | -1.592547 | O | -4.811554 | 0.352218  | -2.017976 |
| C | 4.967638  | 0.595019  | 0.49977   | C | 5.000687  | 0.905603  | -0.302681 | C | -4.987193 | 0.287689  | -0.739903 |
| N | 5.202208  | 1.634483  | -0.254368 | N | 5.543728  | -0.061485 | 0.381363  | N | -5.293207 | 1.388769  | -0.110738 |
| O | -4.355631 | 2.407771  | 1.150642  | O | -5.020627 | -0.791606 | 1.604818  | O | 4.303816  | 2.3678    | -1.365229 |
| C | -4.764533 | 1.248339  | 0.758116  | C | -4.989143 | -0.887109 | 0.31465   | C | 4.747183  | 1.267363  | -0.85472  |
| N | -5.361479 | 1.174393  | -0.401012 | N | -5.498802 | 0.087533  | -0.385499 | N | 5.312429  | 1.323891  | 0.319963  |
| C | 4.8811    | -0.779705 | -0.060073 | C | 4.417014  | 2.107383  | 0.347625  | C | -4.868259 | -1.014021 | -0.032939 |
| H | 4.730898  | -1.49648  | 0.743572  | H | 4.025499  | 2.784862  | -0.407413 | H | -4.882605 | -1.825349 | -0.75773  |
| H | 4.045322  | -0.864646 | -0.756895 | H | 3.60239   | 1.831919  | 1.019522  | H | -3.920648 | -1.064838 | 0.511898  |
| H | 5.805019  | -1.036392 | -0.582146 | H | 5.183444  | 2.636238  | 0.918713  | H | -5.683643 | -1.156463 | 0.67519   |
| C | -4.586586 | 0.055542  | 1.627882  | C | -4.423369 | -2.089888 | -0.343792 | C | 4.632205  | -0.006199 | -1.61164  |
| H | -4.106142 | 0.346359  | 2.55877   | H | -4.223781 | -2.862608 | 0.395075  | H | 4.415229  | 0.210402  | -2.65563  |
| H | -5.554915 | -0.390194 | 1.864284  | H | -5.115872 | -2.479754 | -1.091441 | H | 5.550284  | -0.589038 | -1.552981 |
| H | -3.961493 | -0.693654 | 1.139072  | H | -3.482885 | -1.843663 | -0.84561  | H | 3.809596  | -0.610375 | -1.215845 |
| C | 5.36826   | 1.550152  | -1.695419 | C | 5.634091  | -0.052275 | 1.831802  | C | -5.489768 | 1.435657  | 1.339665  |
| H | 4.487942  | 1.981958  | -2.175886 | H | 4.880081  | -0.729275 | 2.238762  | H | -5.022308 | 2.362621  | 1.674654  |
| H | 6.256642  | 2.116634  | -1.980293 | H | 6.628086  | -0.394895 | 2.122259  | C | -6.952411 | 1.378831  | 1.734833  |
| H | 5.482508  | 0.521524  | -2.02027  | H | 5.477481  | 0.945476  | 2.22954   | H | -4.917434 | 0.631638  | 1.797881  |
| C | 5.204358  | 2.988535  | 0.279191  | C | 6.028601  | -1.277168 | -0.281903 | C | -5.362169 | 2.669282  | -0.800369 |
| H | 4.456153  | 3.570355  | -0.261365 | H | 5.824972  | -2.097673 | 0.407425  | H | -6.254458 | 3.199909  | -0.467009 |
| H | 4.963811  | 2.974486  | 1.33652   | H | 5.423134  | -1.435636 | -1.172163 | H | -4.476096 | 3.254171  | -0.545461 |
| H | 6.190417  | 3.433224  | 0.130022  | C | 7.500857  | -1.194224 | -0.633474 | H | -5.408395 | 2.518188  | -1.873606 |
| C | -5.880714 | -0.066286 | -0.950839 | C | -5.532586 | 0.020451  | -1.841747 | C | 5.82551   | 0.134183  | 1.002951  |
| H | -5.895624 | -0.853276 | -0.204479 | H | -4.540631 | -0.20065  | -2.234324 | H | 5.271997  | -0.736105 | 0.656154  |
| H | -6.897081 | 0.106525  | -1.309279 | H | -6.250119 | -0.72765  | -2.184827 | C | 7.320645  | -0.044584 | 0.826327  |
| H | -5.246561 | -0.375234 | -1.784269 | H | -5.82999  | 0.995898  | -2.216867 | H | 5.561399  | 0.256097  | 2.054417  |
| C | -5.46109  | 2.322162  | -1.290096 | C | -6.01863  | 1.303257  | 0.247287  | C | 5.383353  | 2.566613  | 1.075335  |
| H | -5.010558 | 2.054218  | -2.247038 | H | -5.595163 | 2.141751  | -0.308375 | H | 4.661171  | 2.524041  | 1.893113  |
| H | -6.513127 | 2.573062  | -1.440921 | C | -7.53418  | 1.341812  | 0.249738  | H | 6.388058  | 2.671459  | 1.485979  |
| H | -4.938495 | 3.171619  | -0.864147 | H | -5.625582 | 1.343761  | 1.260072  | H | 5.162705  | 3.412023  | 0.432446  |
|   |           |           |           | H | -7.872222 | 2.277787  | 0.697629  | H | -7.039707 | 1.462839  | 2.819386  |
|   |           |           |           | H | -7.948043 | 0.517378  | 0.833541  | H | -7.415898 | 0.437777  | 1.431025  |
|   |           |           |           | H | -7.943633 | 1.291126  | -0.76169  | H | -7.523144 | 2.19704   | 1.291074  |
|   |           |           |           | H | 8.11929   | -1.017111 | 0.249404  | H | 7.87705   | 0.820797  | 1.191907  |
|   |           |           |           | H | 7.68667   | -0.397006 | -1.354924 | H | 7.586895  | -0.20172  | -0.221109 |
|   |           |           |           | H | 7.821591  | -2.136961 | -1.079995 | H | 7.652201  | -0.916341 | 1.392911  |

Pu-6NO3-2HL-GEOM1\_EMM

|    |           |           |          |
|----|-----------|-----------|----------|
| Pu | 0.011834  | -0.185364 | 0.134335 |
| O  | -0.317622 | -0.6367   | 2.564117 |

Pu-6NO3-2HL-GEOM1\_EEM

|    |          |           |           |
|----|----------|-----------|-----------|
| Pu | 0.015377 | -0.068545 | -0.002057 |
| O  | 0.301029 | 2.411746  | 0.238058  |

Pu-6NO3-2HL-GEOM1\_EME

|    |           |           |          |
|----|-----------|-----------|----------|
| Pu | -0.034403 | 0.155396  | -0.03007 |
| O  | -0.214946 | -1.958186 | 1.307905 |



|   |           |           |           |   |           |           |           |   |           |           |           |
|---|-----------|-----------|-----------|---|-----------|-----------|-----------|---|-----------|-----------|-----------|
| O | -1.791246 | -1.481078 | 1.275385  | O | 1.591789  | 1.490422  | -1.188321 | O | -1.610933 | -1.783945 | -0.295261 |
| O | -1.988365 | -1.71154  | 3.415056  | O | 1.78508   | 3.603334  | -0.784519 | O | -1.703035 | -3.497304 | 1.016586  |
| O | -1.067156 | -2.022593 | -1.413877 | O | 0.690012  | -0.960562 | -2.353224 | O | -0.8699   | -0.106832 | -2.48243  |
| O | -3.08989  | -1.884443 | -2.161497 | O | 2.680845  | -1.648457 | -2.843501 | O | -2.913475 | 0.257169  | -3.089592 |
| O | -2.167079 | -0.222619 | -1.143042 | O | 2.139619  | -1.17514  | -0.811918 | O | -2.238069 | 0.765801  | -1.107605 |
| O | 0.767637  | -2.497177 | 0.75185   | O | -1.126646 | 1.205239  | -1.85777  | O | 1.05552   | -1.802964 | -1.193574 |
| O | 2.396715  | -3.576503 | -0.170941 | O | -2.974416 | 0.6462    | -2.825612 | O | 2.829275  | -1.714652 | -2.422887 |
| O | 1.801079  | -1.630206 | -0.896171 | O | -2.04856  | -0.649789 | -1.364283 | O | 1.928917  | 0.087168  | -1.640169 |
| N | -1.388018 | -1.296613 | 2.469348  | N | 1.243848  | 2.552183  | -0.586413 | N | -1.192973 | -2.461846 | 0.692405  |
| N | -2.113786 | -1.395698 | -1.591103 | N | 1.840538  | -1.274059 | -2.029943 | N | -2.012557 | 0.304432  | -2.256051 |
| N | 1.681051  | -2.614911 | -0.105702 | N | -2.080937 | 0.410927  | -2.051282 | N | 1.967052  | -1.168578 | -1.780935 |
| O | 0.351764  | 0.274366  | -2.340738 | O | -0.271147 | -2.545528 | -0.231899 | O | 0.152232  | 2.270915  | -1.355841 |
| O | 1.809662  | 1.122513  | -1.039366 | O | -1.54063  | -1.608864 | 1.202542  | O | 1.526249  | 2.083895  | 0.263692  |
| O | 2.068393  | 1.287446  | -3.176166 | O | -1.737678 | -3.727023 | 0.82847   | O | 1.629787  | 3.813458  | -1.02598  |
| O | 1.048163  | 1.659971  | 1.632559  | O | -0.684449 | 0.822022  | 2.370021  | O | 0.83023   | 0.432458  | 2.436387  |
| O | 3.085047  | 1.632448  | 2.349876  | O | -2.673374 | 1.531322  | 2.829712  | O | 2.877546  | 0.057081  | 3.017426  |
| O | 2.220082  | -0.099575 | 1.394434  | O | -2.103687 | 1.060129  | 0.803472  | O | 2.166724  | -0.474853 | 1.052077  |
| O | -0.754508 | 2.13368   | -0.531696 | O | 1.173901  | -1.339757 | 1.850952  | O | -1.137401 | 2.111351  | 1.13381   |
| O | -2.435342 | 3.199545  | 0.307537  | O | 3.037356  | -0.775498 | 2.787462  | O | -2.91339  | 2.006318  | 2.360015  |
| O | -1.807566 | 1.298702  | 1.120835  | O | 2.060712  | 0.536281  | 1.374762  | O | -1.977652 | 0.211971  | 1.602935  |
| N | 1.426462  | 0.909884  | -2.232725 | N | -1.202073 | -2.679954 | 0.608564  | N | 1.120709  | 2.774165  | -0.722885 |
| N | 2.126388  | 1.07715   | 1.811026  | N | -1.821452 | 1.150235  | 2.024199  | N | 1.960659  | 0.004106  | 2.194557  |
| N | -1.689626 | 2.252476  | 0.298672  | N | 2.121494  | -0.537524 | 2.04104   | N | -2.038328 | 1.470125  | 1.72834   |
| H | -4.330406 | -0.894655 | -1.942462 | H | 4.085985  | -0.969746 | -2.315959 | H | -4.247452 | -0.13034  | -2.213946 |
| H | 4.446544  | 0.92131   | 1.814395  | H | -4.073228 | 1.614403  | 2.046207  | H | 4.221067  | -0.348621 | 2.260719  |
| O | -4.956734 | -0.112935 | -1.796059 | O | 4.682143  | -0.23684  | -1.980708 | O | -4.798336 | -0.640155 | -1.548578 |
| C | -5.045486 | 0.228677  | -0.550805 | C | 4.933552  | -0.324657 | -0.709673 | C | -5.006312 | 0.014131  | -0.446345 |
| N | -5.259471 | 1.489226  | -0.286707 | N | 5.153554  | 0.800161  | -0.093512 | N | -5.150934 | -0.695241 | 0.633485  |
| O | 5.094808  | 0.32792   | 1.320289  | O | -4.828138 | 1.6627    | 1.374271  | O | 4.949076  | -0.697461 | 1.648073  |
| C | 5.056016  | 0.525608  | 0.03932   | C | -4.962034 | 0.547392  | 0.727035  | C | 5.014808  | -0.025077 | 0.54195   |
| N | 5.204712  | -0.512634 | -0.733762 | N | -5.416825 | 0.626339  | -0.49262  | N | 5.425623  | -0.667012 | -0.514952 |
| C | -4.938991 | -0.790331 | 0.53112   | C | 5.044422  | -1.669612 | -0.071816 | C | -5.157133 | 1.497393  | -0.484025 |
| C | -5.521364 | -2.149774 | 0.165985  | H | 4.424429  | -2.348093 | -0.657786 | H | -4.49983  | 1.862455  | -1.273704 |
| H | -3.873501 | -0.886978 | 0.780406  | C | 6.490848  | -2.165956 | -0.054951 | C | -6.603587 | 1.898666  | -0.778952 |
| H | -5.419537 | -0.408265 | 1.430807  | H | 4.620722  | -1.652791 | 0.93255   | H | -4.801011 | 1.939257  | 0.446605  |
| C | 4.893015  | 1.902879  | -0.517109 | C | -4.667164 | -0.744002 | 1.414147  | C | 4.706423  | 1.433232  | 0.537703  |
| C | 5.358837  | 3.013148  | 0.413201  | H | -3.974316 | -0.528886 | 2.226888  | H | 3.962672  | 1.618002  | 1.311762  |
| H | 5.438372  | 1.955679  | -1.460604 | C | -5.930534 | -1.384964 | 1.990644  | C | 5.95667   | 2.265512  | 0.830136  |
| H | 3.83321   | 2.019597  | -0.778165 | H | -4.14082  | -1.421955 | 0.743571  | H | 4.239326  | 1.722258  | -0.402292 |
| C | -5.369692 | 1.98459   | 1.082806  | C | 5.552797  | 0.898299  | 1.309034  | C | -5.482225 | -0.121661 | 1.927722  |
| H | -5.370514 | 3.07045   | 1.041268  | C | 6.927925  | 1.516338  | 1.472129  | H | -6.163461 | -0.803041 | 2.437673  |
| H | -6.298012 | 1.646608  | 1.547197  | H | 4.786435  | 1.493065  | 1.810831  | H | -4.571132 | 0.001275  | 2.515917  |
| H | -4.508965 | 1.675305  | 1.673769  | H | 5.516567  | -0.089462 | 1.758748  | H | -5.971969 | 0.841426  | 1.821406  |
| C | -5.308157 | 2.498972  | -1.336055 | C | 4.957032  | 2.06214   | -0.804818 | C | -4.904708 | -2.144543 | 0.622959  |
| H | -4.489964 | 3.203253  | -1.17743  | H | 5.819349  | 2.290612  | -1.433234 | C | -6.164286 | -2.941197 | 0.349528  |
| H | -5.208716 | 2.031785  | -2.309493 | H | 4.062217  | 2.000593  | -1.419896 | H | -4.133001 | -2.350473 | -0.1154   |
| H | -6.261632 | 3.02717   | -1.275795 | H | 4.824668  | 2.848826  | -0.065594 | H | -4.488085 | -2.38495  | 1.60211   |
| C | 5.136416  | -0.418736 | -2.186273 | C | -5.718402 | -0.539749 | -1.323983 | C | 5.63253   | -0.034724 | -1.808239 |
| H | 4.429025  | 0.345349  | -2.500104 | H | -5.421975 | -1.437067 | -0.788583 | H | 5.717939  | 1.042655  | -1.712278 |
| H | 6.124346  | -0.22     | -2.609535 | C | -7.183764 | -0.609225 | -1.708585 | H | 6.559866  | -0.418864 | -2.235072 |
| H | 4.777784  | -1.376555 | -2.558458 | H | -5.077442 | -0.465194 | -2.205549 | H | 4.797073  | -0.285128 | -2.465043 |
| C | 5.379763  | -1.858023 | -0.200907 | C | -5.614922 | 1.927144  | -1.121626 | C | 5.649878  | -2.116832 | -0.476586 |
| H | 4.521387  | -2.469666 | -0.484659 | H | -5.420264 | 1.817302  | -2.187045 | H | 5.358544  | -2.491625 | -1.458789 |
| H | 6.288157  | -2.285537 | -0.630216 | H | -6.63521  | 2.282075  | -0.965111 | C | 7.086598  | -2.47045  | -0.146686 |
| H | 5.463115  | -1.825495 | 0.879625  | H | -4.91873  | 2.646327  | -0.700003 | H | 4.966061  | -2.540849 | 0.255973  |

|   |           |           |           |   |           |           |           |   |           |           |           |
|---|-----------|-----------|-----------|---|-----------|-----------|-----------|---|-----------|-----------|-----------|
| H | 4.738754  | 3.092323  | 1.305494  | H | 6.51936   | -3.181662 | 0.340774  | H | -6.670203 | 2.984253  | -0.856067 |
| H | 5.289565  | 3.965024  | -0.114333 | H | 7.12868   | -1.543048 | 0.574592  | H | -7.287356 | 1.574472  | 0.008354  |
| H | 6.396782  | 2.87267   | 0.720967  | H | 6.915349  | -2.183044 | -1.060491 | H | -6.946396 | 1.470576  | -1.722507 |
| H | -5.427284 | -2.811711 | 1.027043  | H | -5.653652 | -2.284074 | 2.541699  | H | 5.682952  | 3.320094  | 0.868558  |
| H | -4.990744 | -2.619497 | -0.661644 | H | -6.638586 | -1.673052 | 1.211627  | H | 6.722826  | 2.142593  | 0.061702  |
| H | -6.579039 | -2.077959 | -0.09569  | H | -6.438314 | -0.707535 | 2.679806  | H | 6.394448  | 1.992916  | 1.792048  |
|   |           |           |           | H | 7.697312  | 0.916406  | 0.981153  | H | 7.786407  | -2.036783 | -0.864734 |
|   |           |           |           | H | 7.168985  | 1.575807  | 2.534704  | H | 7.210101  | -3.554401 | -0.175866 |
|   |           |           |           | H | 6.971785  | 2.528286  | 1.065835  | H | 7.354395  | -2.12545  | 0.853172  |
|   |           |           |           | H | -7.349869 | -1.498723 | -2.318437 | H | -6.553537 | -2.727887 | -0.647219 |
|   |           |           |           | H | -7.492514 | 0.255553  | -2.298244 | H | -6.947098 | -2.732318 | 1.082815  |
|   |           |           |           | H | -7.828068 | -0.674258 | -0.828915 | H | -5.933329 | -4.006345 | 0.402115  |

| Pu-6NO3-2HL-GEOM1_MEE |           |           | Pu-6NO3-2HL-GEOM1_EEE |    |           | Pu-6NO3-2HL-GEOM1_PEE |           |    |           |           |           |
|-----------------------|-----------|-----------|-----------------------|----|-----------|-----------------------|-----------|----|-----------|-----------|-----------|
| Pu                    | -0.0143   | -0.623832 | -0.068723             | Pu | -0.033257 | -0.258743             | 0.101433  | C  | -4.809692 | -0.840301 | 2.872803  |
| O                     | 0.806951  | 1.762892  | -0.356531             | O  | -0.568511 | 1.518108              | -1.598193 | C  | -5.949372 | -0.993654 | 1.885038  |
| O                     | 1.786707  | 0.321485  | -1.583275             | O  | -1.898486 | 1.449973              | 0.067544  | N  | -5.492176 | -1.314364 | 0.529993  |
| O                     | 2.442356  | 2.379127  | -1.626534             | O  | -2.272453 | 2.843332              | -1.539829 | C  | -5.355876 | -2.74537  | 0.220824  |
| O                     | 0.216522  | -2.025093 | -2.063853             | O  | -0.857405 | 0.341725              | 2.489776  | C  | -6.620221 | -3.324799 | -0.381543 |
| O                     | 1.828902  | -3.411638 | -2.450962             | O  | -2.849301 | -0.120993             | 3.196299  | C  | -5.15427  | -0.415298 | -0.35348  |
| O                     | 1.753562  | -2.28343  | -0.608534             | O  | -2.095882 | -0.972646             | 1.367504  | C  | -5.114283 | 1.04343   | -0.065885 |
| O                     | -1.054072 | 0.487092  | -2.030146             | O  | 0.769641  | 2.02025               | 0.813617  | C  | -5.498844 | 1.94135   | -1.237263 |
| O                     | -3.078317 | 0.198024  | -2.726268             | O  | 2.567667  | 2.417824              | 1.944196  | C  | -5.470905 | 3.403779  | -0.826744 |
| O                     | -2.289407 | -0.970997 | -1.08825              | O  | 1.907241  | 0.391988              | 1.580636  | O  | -4.842698 | -0.868943 | -1.526994 |
| N                     | 1.702564  | 1.526699  | -1.206631             | N  | -1.601968 | 1.976034              | -1.046669 | O  | -2.988902 | 0.125311  | -3.074034 |
| N                     | 1.290225  | -2.616449 | -1.744585             | N  | -1.940431 | -0.246621             | 2.382412  | N  | -2.060725 | 0.250416  | -2.283262 |
| N                     | -2.175666 | -0.08628  | -1.984456             | N  | 1.777404  | 1.645647              | 1.469052  | O  | -2.188198 | 0.963502  | -1.256386 |
| O                     | -0.80622  | -2.951395 | 0.388825              | O  | 0.522972  | -2.046061             | 1.775437  | O  | -0.977075 | -0.33234  | -2.430054 |
| O                     | -1.680914 | -1.437121 | 1.605367              | O  | 1.808485  | -1.947097             | 0.078582  | Pu | -0.065067 | 0.217802  | -0.083945 |
| O                     | -2.348502 | -3.483085 | 1.807028              | O  | 2.244181  | -3.348695             | 1.663779  | O  | 1.798893  | 1.879843  | -0.111542 |
| O                     | -0.254674 | 0.931414  | 2.152012              | O  | 0.830554  | -0.862278             | -2.318598 | N  | 1.492847  | 2.453856  | -1.205643 |
| O                     | -1.98483  | 2.180373  | 2.490565              | O  | 2.804012  | -0.32655              | -3.019036 | O  | 2.163498  | 3.326917  | -1.673913 |
| O                     | -1.730966 | 1.121787  | 0.62961               | O  | 2.027821  | 0.474088              | -1.175079 | O  | 0.441606  | 2.022683  | -1.748559 |
| O                     | 1.147518  | -1.702718 | 2.112559              | O  | -0.840177 | -2.539573             | -0.639499 | O  | 0.66302   | -2.061796 | -0.857131 |
| O                     | 3.191082  | -1.269786 | 2.660668              | O  | -2.626754 | -2.909216             | -1.8004   | N  | 1.65203   | -1.701913 | -1.549682 |
| O                     | 2.195878  | -0.145605 | 1.111934              | O  | -1.958189 | -0.894827             | -1.398794 | O  | 1.809142  | -0.44982  | -1.647111 |
| N                     | -1.640596 | -2.671521 | 1.289497              | N  | 1.550484  | -2.490571             | 1.200199  | O  | 2.399479  | -2.486594 | -2.069629 |
| N                     | -1.316067 | 1.423104  | 1.775981              | N  | 1.888136  | -0.241767             | -2.194495 | O  | -0.552879 | -1.581534 | 1.613508  |
| N                     | 2.179929  | -1.051351 | 1.982561              | N  | -1.835631 | -2.154029             | -1.30308  | N  | -1.607789 | -2.025445 | 1.094804  |
| H                     | 4.322848  | -0.366609 | 2.149479              | H  | -4.188973 | 0.145848              | 2.251021  | O  | -2.25409  | -2.910831 | 1.590562  |
| H                     | -3.360908 | 2.42465   | 1.770125              | H  | 4.070001  | 0.311776              | -2.353546 | O  | -1.955607 | -1.468048 | 0.011349  |
| O                     | 4.972726  | 0.342546  | 1.79816               | O  | -4.775787 | 0.683904              | 1.646218  | O  | -1.915874 | 0.86688   | 1.50618   |
| C                     | 5.100414  | 0.315896  | 0.515286              | C  | -5.061859 | 0.130027              | 0.508791  | N  | -1.756345 | 2.125334  | 1.438347  |
| N                     | 5.535202  | 1.405015  | -0.059388             | N  | -5.424265 | 0.936942              | -0.446687 | O  | -2.494832 | 2.890937  | 1.994029  |
| O                     | -4.166776 | 2.478669  | 1.149393              | O  | 4.801153  | 0.790708              | -1.831937 | O  | -0.78434  | 2.496624  | 0.732049  |
| C                     | -4.641331 | 1.301146  | 0.899653              | C  | 5.173879  | 0.162065              | -0.766086 | O  | 2.03414   | -0.569138 | 1.092283  |
| N                     | -5.253131 | 1.1375    | -0.240498             | N  | 5.709106  | 0.884742              | 0.181474  | N  | 1.954483  | 0.131192  | 2.129381  |
| C                     | 4.793082  | -0.914482 | -0.259455             | C  | -5.053033 | -1.353987             | 0.377291  | O  | 2.910293  | 0.184769  | 2.910159  |
| H                     | 4.643713  | -1.753371 | 0.416309              | H  | -4.236522 | -1.721569             | 0.999679  | O  | 0.915932  | 0.767077  | 2.313826  |
| H                     | 3.87513   | -0.778182 | -0.837012             | C  | -6.380858 | -1.957082             | 0.840185  | O  | 4.832674  | -1.008791 | 1.679883  |
| H                     | 5.604967  | -1.152675 | -0.94713              | H  | -4.815245 | -1.647539             | -0.644645 | C  | 5.197073  | -0.439557 | 0.579214  |
| C                     | -4.500814 | 0.215373  | 1.905281              | C  | 4.988544  | -1.312141             | -0.672344 | C  | 4.978099  | 1.018268  | 0.388554  |
| H                     | -4.168243 | 0.63858   | 2.850807              | H  | 3.906765  | -1.484884             | -0.609876 | C  | 5.625627  | 1.878436  | 1.477084  |
| H                     | -5.4492   | -0.297772 | 2.064203              | C  | 5.578497  | -2.068642             | -1.858864 | C  | 5.337599  | 3.351584  | 1.245676  |
| H                     | -3.755037 | -0.517045 | 1.581858              | H  | 5.390637  | -1.689663             | 0.264615  | N  | 5.761608  | -1.208879 | -0.314787 |

|   |           |           |           |   |           |           |           |   |           |           |           |
|---|-----------|-----------|-----------|---|-----------|-----------|-----------|---|-----------|-----------|-----------|
| C | 5.699334  | 1.518329  | -1.508043 | C | -5.88644  | 0.472788  | -1.756813 | C | 5.812635  | -2.661686 | -0.115003 |
| H | 5.345458  | 2.514391  | -1.779349 | H | -6.720942 | 1.123912  | -2.029955 | C | 7.080436  | -3.105576 | 0.588028  |
| C | 7.134261  | 1.308605  | -1.951387 | C | -4.798703 | 0.5129    | -2.811928 | C | 6.333097  | -0.712434 | -1.569933 |
| H | 5.021986  | 0.820993  | -1.996845 | H | -6.294823 | -0.531029 | -1.652485 | C | 5.325116  | -0.665165 | -2.700617 |
| C | 5.802257  | 2.610434  | 0.73431   | C | -5.377353 | 2.392483  | -0.250952 | H | -4.306358 | -0.254302 | -2.099803 |
| C | 4.550328  | 3.434749  | 0.966201  | C | -6.65397  | 2.930154  | 0.365115  | H | 4.1205    | -0.493929 | 2.195468  |
| H | 6.249812  | 2.306125  | 1.679591  | H | -4.507176 | 2.620533  | 0.361039  | H | -4.083738 | 1.252705  | 0.242234  |
| H | 6.550331  | 3.180963  | 0.181031  | H | -5.198044 | 2.826737  | -1.234176 | H | -5.73506  | 1.269521  | 0.800319  |
| C | -5.78801  | -0.154675 | -0.672322 | C | 6.297812  | 0.323422  | 1.401564  | H | 3.893077  | 1.177317  | 0.386217  |
| H | -5.439005 | -0.922333 | 0.013475  | H | 6.798674  | -0.61318  | 1.157211  | H | 5.315661  | 1.336231  | -0.595733 |
| C | -7.299895 | -0.169462 | -0.778475 | H | 7.082581  | 1.021981  | 1.699448  | H | -6.607142 | -1.814763 | 2.177119  |
| H | -5.318806 | -0.369939 | -1.634954 | C | 5.289743  | 0.142703  | 2.518502  | H | -6.570168 | -0.098716 | 1.852422  |
| C | -5.314816 | 2.24638   | -1.203899 | C | 5.7073    | 2.350007  | 0.086363  | H | -4.503006 | -2.866321 | -0.443092 |
| H | -5.498343 | 1.791332  | -2.176855 | H | 5.590299  | 2.721099  | 1.10561   | H | -5.099305 | -3.235427 | 1.160213  |
| C | -6.372999 | 3.281008  | -0.871076 | C | 6.968942  | 2.889425  | -0.558058 | H | 6.784507  | 0.263486  | -1.394001 |
| H | -4.326796 | 2.705617  | -1.240602 | H | 4.823696  | 2.650435  | -0.472732 | H | 7.154329  | -1.390702 | -1.811813 |
| H | 7.207601  | 1.449222  | -3.031142 | H | -6.322084 | -3.044106 | 0.78048   | H | 5.73297   | -3.109203 | -1.106948 |
| H | 7.482613  | 0.300449  | -1.717472 | H | -7.218457 | -1.629183 | 0.220665  | H | 4.929994  | -2.956114 | 0.449353  |
| H | 7.81161   | 2.02024   | -1.474625 | H | -6.598488 | -1.686913 | 1.87498   | H | -6.495757 | 1.670011  | -1.600149 |
| H | -7.625861 | -1.161254 | -1.096609 | H | 5.389959  | -3.134443 | -1.728984 | H | -4.804325 | 1.792015  | -2.067382 |
| H | -7.663072 | 0.54842   | -1.515946 | H | 6.657918  | -1.920021 | -1.934605 | H | 5.245     | 1.578747  | 2.456526  |
| H | -7.772784 | 0.052675  | 0.180764  | H | 5.120962  | -1.766216 | -2.80087  | H | 6.706646  | 1.701517  | 1.491392  |
| H | 4.073763  | 3.716937  | 0.02619   | H | 7.864964  | 2.583255  | -0.012904 | H | 7.974445  | -2.804529 | 0.036836  |
| H | 4.811776  | 4.345191  | 1.508926  | H | 6.937888  | 3.980391  | -0.562562 | H | 7.090238  | -4.193796 | 0.671446  |
| H | 3.823095  | 2.879075  | 1.558956  | H | 7.055721  | 2.547935  | -1.590544 | H | 7.134142  | -2.68728  | 1.594065  |
| H | -7.37134  | 2.842017  | -0.833743 | H | -6.807258 | 2.527269  | 1.367121  | H | -6.846334 | -2.85884  | -1.34175  |
| H | -6.372566 | 4.053351  | -1.642674 | H | -7.529012 | 2.693075  | -0.244956 | H | -7.480364 | -3.195406 | 0.279921  |
| H | -6.16684  | 3.761986  | 0.085235  | H | -6.587412 | 4.016642  | 0.444221  | H | -6.485342 | -4.394993 | -0.548034 |
|   |           |           |           | H | 4.532824  | -0.599051 | 2.260639  | H | 4.514442  | 0.033179  | -2.487795 |
|   |           |           |           | H | 4.764116  | 1.073002  | 2.738836  | H | 4.86737   | -1.640255 | -2.872506 |
|   |           |           |           | H | 5.806027  | -0.188632 | 3.421622  | H | 5.824541  | -0.350027 | -3.618909 |
|   |           |           |           | H | -3.980662 | -0.165051 | -2.56454  | H | -4.158379 | -0.00439  | 2.612165  |
|   |           |           |           | H | -4.381599 | 1.515585  | -2.920909 | H | -4.195713 | -1.741841 | 2.910272  |
|   |           |           |           | H | -5.221288 | 0.2148    | -3.773384 | H | -5.218066 | -0.661631 | 3.869489  |
|   |           |           |           |   |           |           |           | H | 5.783341  | 3.961216  | 2.033693  |
|   |           |           |           |   |           |           |           | H | 4.262442  | 3.542275  | 1.233175  |
|   |           |           |           |   |           |           |           | H | 5.742684  | 3.691425  | 0.28902   |
|   |           |           |           |   |           |           |           | H | -6.182373 | 3.606454  | -0.021619 |
|   |           |           |           |   |           |           |           | H | -5.728582 | 4.047041  | -1.669692 |
|   |           |           |           |   |           |           |           | H | -4.478367 | 3.692825  | -0.473608 |

|    | Pu-6NO3-2HL-GEOM1_IEE |           |           | Pu-6NO3-2HL-GEOM1_C4M |           |           | Pu-6NO3-2HL-GEOM1_C4E |    |           |           |           |
|----|-----------------------|-----------|-----------|-----------------------|-----------|-----------|-----------------------|----|-----------|-----------|-----------|
| Pu | 0.015829              | -0.124627 | -0.079689 | Pu                    | -0.00009  | 0.449659  | -0.000278             | Pu | -0.006    | -0.607593 | -0.115992 |
| O  | 0.227021              | 1.905856  | 1.387164  | O                     | -1.571352 | -0.649098 | 1.64689               | O  | -2.138429 | -1.713724 | 0.592887  |
| O  | 1.678655              | 1.766434  | -0.168848 | O                     | -1.608193 | 1.479085  | 1.671135              | O  | -0.929143 | -0.939019 | 2.165958  |
| O  | 1.787832              | 3.393071  | 1.24767   | O                     | -3.002526 | 0.374526  | 2.898813              | O  | -2.808294 | -1.891792 | 2.640485  |
| O  | 0.968369              | 0.216918  | -2.483342 | O                     | -0.775732 | 2.673921  | -0.733567             | O  | 0.698398  | 1.218811  | 1.480749  |
| O  | 3.001594              | -0.267772 | -3.037371 | O                     | -0.00047  | 4.554082  | -0.001318             | O  | 2.269519  | 1.072561  | 2.954303  |
| O  | 2.236468              | -0.76244  | -1.085178 | O                     | 0.775198  | 2.674457  | 0.731873              | O  | 1.822175  | -0.584993 | 1.642901  |
| O  | -0.93524              | 1.949124  | -1.160508 | O                     | -2.406446 | 0.390852  | -0.830899             | O  | -1.891906 | 1.096425  | 0.392018  |
| O  | -2.595241             | 1.997966  | -2.54233  | O                     | -3.075973 | 0.231992  | -2.877039             | O  | -2.210835 | 3.020094  | -0.534011 |
| O  | -1.840137             | 0.123321  | -1.777386 | O                     | -0.977677 | 0.403143  | -2.407449             | O  | -0.442623 | 1.866564  | -0.966276 |
| N  | 1.248687              | 2.400808  | 0.841132  | N                     | -2.092319 | 0.406032  | 2.108552              | N  | -1.992021 | -1.534134 | 1.837274  |
| N  | 2.07601               | -0.269816 | -2.230991 | N                     | -0.000343 | 3.362401  | -0.001015             | N  | 1.618552  | 0.586035  | 2.064293  |
| N  | -1.817629             | 1.383785  | -1.857132 | N                     | -2.16085  | 0.344721  | -2.061834             | N  | -1.514173 | 2.01209   | -0.371938 |

|   |           |           |           |   |           |           |           |   |           |           |           |
|---|-----------|-----------|-----------|---|-----------|-----------|-----------|---|-----------|-----------|-----------|
| O | -0.210345 | -2.1577   | -1.530597 | O | 1.607877  | 1.478265  | -1.672291 | O | 2.153711  | 0.602563  | -0.897608 |
| O | -1.644578 | -1.984361 | 0.036879  | O | 1.571578  | -0.649909 | -1.646441 | O | 0.947264  | -0.083538 | -2.51233  |
| O | -1.764019 | -3.647259 | -1.337103 | O | 3.003572  | 0.373068  | -2.897917 | O | 2.893053  | 0.753264  | -2.920103 |
| O | -0.922779 | -0.48194  | 2.331175  | O | 0.792281  | -1.860938 | 0.71455   | O | -0.748347 | -2.288038 | -1.829336 |
| O | -2.92961  | 0.005179  | 2.952634  | O | -0.000236 | -3.739078 | 0.001368  | O | -2.386246 | -2.004695 | -3.212197 |
| O | -2.220755 | 0.527693  | 0.980518  | O | -0.792291 | -1.861375 | -0.713505 | O | -1.77743  | -0.423014 | -1.874167 |
| O | 0.983719  | -2.191288 | 0.993762  | O | 2.406108  | 0.391717  | 0.830473  | O | 1.861344  | -2.11338  | -0.734551 |
| O | 2.718935  | -2.245053 | 2.278818  | O | 3.076025  | 0.234998  | 2.876617  | O | 2.196523  | -4.071548 | 0.115996  |
| O | 1.882756  | -0.36451  | 1.617288  | O | 0.977532  | 0.404781  | 2.407195  | O | 0.465703  | -2.900466 | 0.670082  |
| N | -1.225695 | -2.645826 | -0.964573 | N | 2.09265   | 0.404994  | -2.108467 | N | 2.002758  | 0.427436  | -2.130816 |
| N | -2.028004 | 0.017819  | 2.107382  | N | -0.000076 | -2.538117 | 0.000839  | N | -1.663104 | -1.597209 | -2.346968 |
| N | 1.89096   | -1.628424 | 1.659118  | N | 2.160644  | 0.346584  | 2.061473  | N | 1.535124  | -3.080905 | 0.022467  |
| H | 4.342802  | -0.038529 | -2.108433 | C | 3.988922  | -2.57983  | -0.397688 | C | 4.600676  | 2.377077  | 1.086858  |
| H | -4.241817 | 0.359285  | 2.263252  | H | 3.698934  | -1.933533 | -1.220802 | H | 4.391845  | 1.53255   | 1.734875  |
| O | 4.894701  | 0.548103  | -1.509992 | C | 5.139319  | -0.583054 | 0.454208  | C | 5.206729  | 0.566355  | -0.458046 |
| C | 5.361722  | 0.030181  | -0.418913 | C | 4.734846  | -2.454099 | 1.932494  | C | 5.377231  | 2.862908  | -1.228515 |
| N | 5.491716  | 0.850979  | 0.585515  | H | 5.442615  | -1.946293 | 2.583655  | H | 5.777232  | 2.336316  | -2.093223 |
| O | -5.002798 | 0.778105  | 1.716203  | N | 4.718389  | -1.835749 | 0.617985  | N | 5.137288  | 1.871804  | -0.176303 |
| C | -5.443262 | 0.115169  | 0.697739  | O | 5.262329  | 0.207029  | 1.485468  | O | 5.071947  | 0.15803   | -1.691994 |
| N | -5.662934 | 0.79812   | -0.39265  | H | 5.044279  | -3.494943 | 1.81837   | H | 6.172241  | 3.524124  | -0.869845 |
| C | 5.850849  | -1.391459 | -0.379074 | H | 3.069704  | -2.95433  | 0.056526  | H | 3.626183  | 2.823043  | 0.868557  |
| C | 5.054377  | -2.334228 | -1.270935 | C | 5.970483  | -0.893672 | -1.828654 | C | 5.482976  | 3.392427  | 1.784896  |
| C | 7.330497  | -1.388015 | -0.789706 | H | 6.195976  | -1.90401  | -1.497055 | H | 5.604181  | 4.304972  | 1.197951  |
| H | 5.760449  | -1.744988 | 0.649739  | C | 5.557025  | 1.351984  | -0.929576 | H | 5.015734  | 3.672301  | 2.730555  |
| C | -5.805064 | -1.338427 | 0.820767  | H | 4.988061  | 1.863983  | -0.159971 | H | 6.478494  | 2.99827   | 2.002935  |
| H | -5.887348 | -1.752401 | -0.184145 | N | 5.502078  | -0.086602 | -0.719833 | C | 4.164276  | 3.684882  | -1.62189  |
| C | -4.758831 | -2.155173 | 1.568988  | H | 5.1148    | 1.571301  | -1.902277 | H | 4.442978  | 4.354352  | -2.438148 |
| C | -7.1737   | -1.420763 | 1.507571  | H | 6.890945  | -0.442973 | -2.207586 | H | 3.34508   | 3.053538  | -1.96513  |
| C | 6.133382  | 0.500539  | 1.854483  | H | 4.450524  | 0.168157  | 2.088213  | H | 3.802492  | 4.305251  | -0.800241 |
| H | 6.754591  | 1.359513  | 2.122175  | C | -3.988622 | -2.579613 | 0.398172  | C | 6.227389  | -0.15408  | 1.659962  |
| C | 5.138818  | 0.192352  | 2.956287  | H | -3.698638 | -1.933098 | 1.221104  | H | 6.537545  | 0.888423  | 1.67722   |
| H | 6.811565  | -0.335318 | 1.696259  | C | -5.139225 | -0.583014 | -0.453636 | C | 5.197333  | -1.782575 | 0.086966  |
| C | 4.998548  | 2.234514  | 0.482506  | C | -4.736714 | -2.454994 | -1.931352 | H | 4.323862  | -1.811837 | -0.559999 |
| C | 6.024286  | 3.167505  | -0.129534 | H | -5.444897 | -1.94736  | -2.582194 | N | 5.466936  | -0.380648 | 0.43391   |
| H | 4.072909  | 2.226584  | -0.08921  | N | -4.719009 | -1.835975 | -0.617171 | H | 4.910137  | -2.280622 | 1.013408  |
| H | 4.74572   | 2.543659  | 1.49653   | O | -5.262934 | 0.206685  | -1.485096 | H | 7.145019  | -0.745952 | 1.571682  |
| C | -6.294625 | 0.236527  | -1.590593 | H | -5.046359 | -3.495687 | -1.816431 | C | 5.506577  | -0.532623 | 2.941442  |
| H | -7.041418 | -0.498109 | -1.290678 | H | -5.069435 | -2.953755 | -0.056413 | H | 5.328196  | -1.606892 | 3.002084  |
| H | -6.841362 | 1.060769  | -2.053392 | C | -5.968888 | -0.89234  | 1.829906  | H | 6.134084  | -0.259624 | 3.792629  |
| C | -5.290982 | -0.348566 | -2.565211 | H | -6.194667 | -1.902808 | 1.498876  | H | 4.541992  | -0.034132 | 3.048186  |
| C | -5.260077 | 2.208914  | -0.482062 | C | -5.555144 | 1.352818  | 0.929515  | C | 6.374791  | -2.486559 | -0.558832 |
| H | -4.95849  | 2.376305  | -1.516564 | H | -4.985575 | 1.864187  | 0.159926  | H | 6.104834  | -3.526363 | -0.752463 |
| C | -6.372271 | 3.150693  | -0.065544 | N | -5.50075  | -0.085912 | 0.720493  | H | 6.635086  | -2.019995 | -1.509669 |
| H | -4.378982 | 2.345369  | 0.140966  | H | -5.113181 | 1.572367  | 1.902275  | H | 7.258549  | -2.489973 | 0.083896  |
| H | 7.719862  | -2.405849 | -0.734711 | H | -6.889131 | -0.44129  | 2.208961  | H | 4.277361  | 0.560263  | -2.167769 |
| H | 7.946427  | -0.752458 | -0.150357 | H | -4.45229  | 0.166605  | -2.08894  | C | -5.096292 | -0.349303 | -1.338926 |
| H | 7.439034  | -1.040099 | -1.819245 | H | 3.742082  | -2.433481 | 2.388585  | H | -4.900822 | -0.972198 | -0.471064 |
| H | -5.071022 | -3.200933 | 1.56332   | H | 4.575099  | -3.425359 | -0.767184 | C | -4.961462 | 1.412873  | 0.375856  |
| H | -4.664921 | -1.845994 | 2.611039  | H | 5.235865  | -0.920277 | -2.636035 | C | -5.294532 | 2.060334  | -1.94397  |
| H | -3.780991 | -2.101558 | 1.088477  | H | 6.59248   | 1.702391  | -0.909074 | H | -5.29038  | 3.036688  | -1.463201 |
| H | -7.270278 | 3.013329  | -0.672889 | H | -6.590415 | 1.703733  | 0.908419  | N | -5.148376 | 1.045945  | -0.893841 |
| H | -6.038989 | 4.181966  | -0.193409 | H | -5.233955 | -0.918647 | 2.637001  | O | -4.45361  | 2.585189  | 0.651526  |
| H | -6.634517 | 3.005982  | 0.983597  | H | -4.574282 | -3.425329 | 0.768068  | H | -6.291231 | 1.92718   | -2.377697 |
| H | 6.246025  | 2.88668   | -1.159895 | H | -3.74432  | -2.434868 | -2.388259 | H | -4.211498 | -0.44448  | -1.971762 |
| H | 6.956964  | 3.178463  | 0.440215  |   |           |           |           | C | -6.318858 | -0.818603 | -2.102592 |

|   |           |           |           |   |           |           |           |
|---|-----------|-----------|-----------|---|-----------|-----------|-----------|
| H | 5.62366   | 4.182488  | -0.134628 | H | -6.450143 | -0.268805 | -3.036492 |
| H | -4.761906 | -1.200135 | -2.133885 | H | -6.184457 | -1.86933  | -2.364982 |
| H | -4.54015  | 0.386575  | -2.858235 | H | -7.243217 | -0.728648 | -1.526852 |
| H | -5.813881 | -0.687081 | -3.461883 | C | -4.250016 | 2.003458  | -3.041596 |
| H | 4.531103  | -0.682827 | 2.723526  | H | -4.459588 | 2.799276  | -3.759481 |
| H | 4.457921  | 1.026751  | 3.130141  | H | -3.243299 | 2.154172  | -2.654494 |
| H | 5.68362   | 0.003579  | 3.883585  | H | -4.267163 | 1.05732   | -3.584074 |
| H | -7.122475 | -1.005352 | 2.515896  | C | -6.411749 | -0.278329 | 1.418692  |
| H | -7.473969 | -2.46697  | 1.585628  | H | -6.874964 | -0.242668 | 0.435716  |
| H | -7.949204 | -0.883827 | 0.955881  | C | -4.729718 | 0.994899  | 2.737981  |
| H | 3.998395  | -2.354968 | -1.008312 | H | -3.731049 | 1.394184  | 2.57347   |
| H | 5.457659  | -3.34118  | -1.153148 | N | -5.302724 | 0.671975  | 1.426752  |
| H | 5.144952  | -2.070071 | -2.327282 | H | -4.606013 | 0.048584  | 3.265814  |
|   |           |           |           | H | -7.158369 | 0.105385  | 2.122748  |
|   |           |           |           | C | -6.051665 | -1.701777 | 1.800854  |
|   |           |           |           | H | -5.702788 | -1.772501 | 2.831089  |
|   |           |           |           | H | -6.943178 | -2.326162 | 1.710259  |
|   |           |           |           | H | -5.26765  | -2.121842 | 1.170586  |
|   |           |           |           | C | -5.567533 | 1.965644  | 3.548388  |
|   |           |           |           | H | -5.092324 | 2.130824  | 4.517421  |
|   |           |           |           | H | -5.650127 | 2.927409  | 3.040705  |
|   |           |           |           | H | -6.572743 | 1.582751  | 3.739297  |
|   |           |           |           | H | -3.609032 | 2.785426  | 0.125116  |

## 4.2 Geometry II

| Pu-6NO3-2C4M_geom2 |           |           | Pu-6NO3-2C4E_geom2 |    |           | Pu-6NO3-2PEE_geom2 |           |    |           |           |           |
|--------------------|-----------|-----------|--------------------|----|-----------|--------------------|-----------|----|-----------|-----------|-----------|
| Pu                 | -0.000047 | 0.435064  | 0.000032           | Pu | -0.000012 | -0.693854          | 0.000033  | Pu | 0.000026  | -0.000212 | 0.000015  |
| O                  | 1.948067  | -0.667515 | -1.19015           | O  | 2.555942  | -0.642074          | 0.394068  | O  | -0.286056 | -1.098704 | 2.238054  |
| O                  | 1.963984  | 1.460958  | -1.243834          | O  | 1.384629  | -0.648386          | 2.168044  | O  | -1.411545 | -1.968099 | 0.64985   |
| O                  | 3.591014  | 0.361085  | -2.144264          | O  | 3.533344  | -0.517314          | 2.322621  | O  | -1.609832 | -2.755671 | 2.652596  |
| O                  | 0.578532  | 2.662526  | 0.895191           | O  | -1.260216 | -1.719393          | 1.933989  | O  | -0.361957 | -1.623462 | -1.966531 |
| O                  | -0.000272 | 4.542793  | -0.000847          | O  | -2.362379 | -0.61153           | 3.428793  | O  | -2.207614 | -1.885333 | -3.060168 |
| O                  | -0.578874 | 2.662081  | -0.896085          | O  | -1.228738 | 0.40966            | 1.898738  | O  | -2.019444 | -0.375005 | -1.518869 |
| N                  | 2.537121  | 0.389537  | -1.556357          | O  | 0.898773  | -2.921296          | 0.574618  | O  | 1.358294  | -2.132272 | 0.210784  |
| N                  | -0.000223 | 3.350825  | -0.000583          | O  | -0.00005  | -4.801143          | 0.000294  | O  | 3.230681  | -2.54097  | -0.787774 |
| O                  | -1.9642   | 1.461314  | 1.24339            | O  | -0.898853 | -2.92136           | -0.574272 | O  | 2.197023  | -0.666498 | -1.086019 |
| O                  | -1.94806  | -0.667176 | 1.190709           | N  | 2.519381  | -0.60351           | 1.679279  | N  | -1.119211 | -1.976979 | 1.888204  |
| O                  | -3.59119  | 0.3617    | 2.144209           | N  | -1.643139 | -0.645044          | 2.468304  | N  | -1.53928  | -1.33835  | -2.232644 |
| O                  | -0.591299 | -1.879519 | -0.885936          | N  | -0.00004  | -3.608632          | 0.000209  | N  | 2.294803  | -1.818303 | -0.56443  |
| O                  | 0.000048  | -3.758634 | 0.000771           | O  | 1.228767  | 0.409388           | -1.898805 | O  | 0.286116  | 1.098267  | -2.238032 |
| O                  | 0.591276  | -1.879183 | 0.886846           | O  | 2.362339  | -0.612034          | -3.428754 | O  | 1.411609  | 1.967668  | -0.649831 |
| O                  | -2.12975  | 0.385702  | -1.425637          | O  | 1.260151  | -1.719671          | -1.933801 | O  | 1.609917  | 2.755209  | -2.652586 |
| O                  | -2.210044 | 0.277653  | -3.586244          | O  | -0.911774 | 1.62545            | -0.552977 | O  | 0.361997  | 1.623028  | 1.966557  |
| O                  | -0.321428 | 0.388042  | -2.542296          | O  | 0.000166  | 3.503719           | -0.000318 | O  | 2.207666  | 1.884952  | 3.06016   |
| N                  | -2.53723  | 0.389978  | 1.556406           | O  | 0.911831  | 1.625436           | 0.552743  | O  | 2.019502  | 0.374597  | 1.518888  |
| N                  | 0.000032  | -2.558014 | 0.000552           | N  | 1.643126  | -0.645403          | -2.468242 | O  | -1.35825  | 2.131833  | -0.210769 |
| N                  | -1.561135 | 0.350523  | -2.583312          | N  | 0.000079  | 2.302004           | -0.000196 | O  | -3.230641 | 2.54052   | 0.787794  |
| C                  | -4.588036 | -2.597598 | 0.690036           | C  | 5.519674  | 2.597058           | 0.777286  | O  | -2.196967 | 0.666057  | 1.08604   |
| H                  | -4.808976 | -2.025604 | 1.587092           | H  | 5.923166  | 3.464102           | 0.244497  | N  | 1.119228  | 1.976579  | -1.888173 |
| C                  | -5.140927 | -0.504525 | -0.444967          | C  | 5.677587  | 0.35024            | -0.174114 | N  | 1.539314  | 1.337908  | 2.232692  |
| C                  | -3.931467 | -2.233883 | -1.64791           | C  | 3.971627  | 1.839701           | -1.050419 | N  | -2.294791 | 1.817835  | 0.564398  |
| H                  | -4.120542 | -1.597744 | -2.510073          | H  | 3.058952  | 1.87892            | -0.455485 | H  | -3.511713 | -0.038222 | -1.524974 |
| N                  | -4.651022 | -1.741354 | -0.482194          | N  | 5.129351  | 1.565482           | -0.184723 | H  | 3.511804  | 0.037954  | 1.524915  |
| O                  | -4.678084 | 0.426114  | -1.223233          | O  | 4.979531  | -0.703518          | -0.466734 | O  | -4.417695 | 0.399543  | -1.372435 |

|   |           |           |           |   |           |           |           |   |           |           |           |
|---|-----------|-----------|-----------|---|-----------|-----------|-----------|---|-----------|-----------|-----------|
| H | -4.291957 | -3.240956 | -1.870386 | H | 3.868715  | 1.001459  | -1.736924 | C | -5.052807 | -0.058318 | -0.347072 |
| H | -3.56356  | -2.961722 | 0.780867  | H | 6.318672  | 2.188144  | 1.394304  | N | -6.047186 | 0.667901  | 0.092041  |
| C | -7.138046 | -1.094662 | 0.83362   | C | 4.366664  | 3.016082  | 1.672183  | O | 4.417834  | -0.399639 | 1.372213  |
| H | -7.077233 | -2.032315 | 0.286763  | H | 3.979861  | 2.164949  | 2.234589  | C | 5.052802  | 0.058778  | 0.347012  |
| C | -6.382877 | 1.235752  | 0.684396  | H | 4.727969  | 3.762177  | 2.383135  | N | 6.047343  | -0.667018 | -0.092437 |
| H | -5.500337 | 1.826886  | 0.46261   | H | 3.540777  | 3.459029  | 1.115005  | C | -4.672507 | -1.37299  | 0.232152  |
| N | -6.151804 | -0.157402 | 0.345595  | C | 4.14662   | 3.114828  | -1.850381 | C | -5.143566 | -2.54046  | -0.645669 |
| H | -6.590566 | 1.303545  | 1.753711  | H | 3.296546  | 3.210596  | -2.527492 | H | -5.050627 | -1.478162 | 1.247712  |
| H | -8.129261 | -0.664886 | 0.669715  | H | 4.165265  | 4.006505  | -1.220739 | C | 4.672118  | 1.373576  | -0.231668 |
| H | -3.681346 | 0.355114  | -1.403206 | H | 5.058597  | 3.090832  | -2.452145 | H | 5.050166  | 1.479257  | -1.247201 |
| H | -2.857813 | -2.275821 | -1.452806 | C | 8.012266  | 1.099783  | -0.22269  | C | 5.142869  | 2.540834  | 0.646597  |
| H | -5.263562 | -3.452912 | 0.60298   | H | 8.687528  | 1.17706   | 0.634873  | C | -6.896456 | 0.26392   | 1.210941  |
| H | -7.020343 | -1.289407 | 1.902886  | C | 7.394678  | -1.200072 | 0.533497  | H | -6.99035  | -0.821235 | 1.215752  |
| H | -7.235397 | 1.630584  | 0.12503   | H | 8.479978  | -1.220239 | 0.43092   | C | -6.38406  | 0.78129   | 2.541398  |
| O | 2.129647  | 0.386454  | 1.425601  | N | 6.96547   | 0.137272  | 0.10322   | H | -7.892367 | 0.659281  | 0.998403  |
| O | 2.210102  | 0.278949  | 3.586229  | H | 6.991222  | -1.949182 | -0.147995 | C | -6.323667 | 1.982072  | -0.499108 |
| O | 0.321411  | 0.389069  | 2.542383  | H | 7.562386  | 2.078665  | -0.364615 | C | -7.265196 | 1.894188  | -1.684242 |
| N | 1.561124  | 0.351584  | 2.583333  | C | 8.778262  | 0.719024  | -1.47855  | H | -6.752578 | 2.592122  | 0.297439  |
| C | 4.588605  | -2.597687 | -0.689901 | H | 8.112583  | 0.684372  | -2.343248 | H | -5.373236 | 2.432706  | -0.778808 |
| H | 4.809986  | -2.025904 | -1.586983 | H | 9.552999  | 1.463738  | -1.673168 | C | 6.896446  | -0.262387 | -1.211231 |
| C | 5.141055  | -0.504345 | 0.444776  | H | 9.267007  | -0.252118 | -1.386479 | H | 6.990068  | 0.822794  | -1.215625 |
| C | 3.931275  | -2.233448 | 1.647763  | C | 6.996706  | -1.500883 | 1.964956  | H | 7.892467  | -0.657581 | -0.998903 |
| H | 4.120285  | -1.597265 | 2.509911  | H | 7.352652  | -2.494575 | 2.244571  | C | 6.384104  | -0.779368 | -2.541861 |
| N | 4.651277  | -1.741226 | 0.482189  | H | 7.434714  | -0.777133 | 2.656353  | C | 6.324195  | -1.98135  | 0.498179  |
| O | 4.677878  | 0.426471  | 1.222631  | H | 5.913062  | -1.483275 | 2.087749  | H | 6.753225  | -2.590972 | -0.298632 |
| H | 4.29147   | -3.240578 | 1.870443  | H | 4.010637  | -0.639834 | -0.171314 | C | 7.265764  | -1.893689 | 1.683298  |
| H | 3.564109  | -2.961678 | -0.781072 | O | -2.555978 | -0.642084 | -0.39405  | H | 5.373897  | -2.432344 | 0.777748  |
| C | 7.138517  | -1.094759 | -0.833112 | O | -1.384605 | -0.648611 | -2.167989 | H | 8.218344  | -1.433784 | 1.409281  |
| H | 7.077452  | -2.032328 | -0.28614  | O | -3.533311 | -0.517562 | -2.322657 | H | 7.474046  | -2.897012 | 2.059187  |
| C | 6.383327  | 1.235706  | -0.684591 | N | -2.51937  | -0.603638 | -1.679262 | H | 6.819228  | -1.315076 | 2.492896  |
| H | 5.500662  | 1.82686   | -0.463353 | C | -5.519377 | 2.597066  | -0.77726  | H | -8.21791  | 1.43464   | -1.410092 |
| N | 6.152145  | -0.15738  | -0.345578 | H | -5.922747 | 3.464182  | -0.244497 | H | -6.818769 | 1.315138  | -2.493588 |
| H | 6.591511  | 1.303256  | -1.753824 | C | -5.677637 | 0.350226  | 0.174046  | H | -7.473197 | 2.897416  | -2.060539 |
| H | 8.129699  | -0.665011 | -0.668932 | C | -3.971651 | 1.839465  | 1.050632  | H | 5.397174  | -0.373393 | -2.769806 |
| H | 3.681156  | 0.355213  | 1.402649  | H | -3.058843 | 1.878313  | 0.455882  | H | 6.300002  | -1.867432 | -2.539492 |
| H | 2.85766   | -2.275171 | 1.45239   | N | -5.129311 | 1.565427  | 0.184787  | H | 7.072082  | -0.491935 | -3.33915  |
| H | 5.263982  | -3.453073 | -0.602413 | O | -4.979663 | -0.703598 | 0.466646  | H | -6.299676 | 1.869332  | 2.538607  |
| H | 7.02117   | -1.289659 | -1.90239  | H | -3.869119 | 1.0013    | 1.737295  | H | -5.397249 | 0.375147  | 2.769563  |
| H | 7.235575  | 1.630702  | -0.124924 | H | -6.318408 | 2.1883    | -1.394333 | H | -7.07216  | 0.494349  | 3.338758  |
|   |           |           |           | C | -4.366228 | 3.015866  | -1.672082 | H | 4.727881  | 2.422913  | 1.651603  |
|   |           |           |           | H | -3.979619 | 2.164678  | -2.234537 | H | 6.233361  | 2.511291  | 0.751498  |
|   |           |           |           | H | -4.727317 | 3.762105  | -2.382994 | H | -6.234046 | -2.510639 | -0.750621 |
|   |           |           |           | H | -3.540244 | 3.458556  | -1.114844 | H | -4.728506 | -2.423055 | -1.650706 |
|   |           |           |           | C | -4.146414 | 3.114759  | 1.850372  | H | -3.581968 | -1.394024 | 0.304594  |
|   |           |           |           | H | -3.296442 | 3.210356  | 2.527634  | H | 3.581566  | 1.394328  | -0.304052 |
|   |           |           |           | H | -4.164659 | 4.006352  | 1.2206    | C | 4.706115  | 3.871775  | 0.0599    |
|   |           |           |           | H | -5.058516 | 3.091131  | 2.451962  | H | 5.145699  | 4.034468  | -0.927718 |
|   |           |           |           | C | -8.012246 | 1.099975  | 0.222557  | H | 3.620679  | 3.910772  | -0.051905 |
|   |           |           |           | H | -8.687428 | 1.177376  | -0.635059 | H | 5.014066  | 4.697071  | 0.704484  |
|   |           |           |           | C | -7.394852 | -1.199902 | -0.5337   | C | -4.707224 | -3.8713   | -0.058438 |
|   |           |           |           | H | -8.480139 | -1.220031 | -0.430971 | H | -5.146884 | -4.033476 | 0.929231  |
|   |           |           |           | N | -6.965528 | 0.137373  | -0.103325 | H | -5.015403 | -4.696756 | -0.702709 |
|   |           |           |           | H | -6.991337 | -1.949104 | 0.147653  | H | -3.621803 | -3.910577 | 0.053413  |
|   |           |           |           | H | -7.562278 | 2.078801  | 0.364584  |   |           |           |           |
|   |           |           |           | C | -8.77839  | 0.71921   | 1.478324  |   |           |           |           |

|   |           |           |           |
|---|-----------|-----------|-----------|
| H | -8.112787 | 0.684428  | 2.343075  |
| H | -9.553062 | 1.463995  | 1.672926  |
| H | -9.267234 | -0.251872 | 1.386147  |
| C | -6.997096 | -1.50057  | -1.96525  |
| H | -7.35315  | -2.494203 | -2.244935 |
| H | -7.435147 | -0.776709 | -2.656503 |
| H | -5.913468 | -1.483023 | -2.088183 |
| H | -4.010763 | -0.639941 | 0.171259  |

| Pu-6NO3-2IEE_geom2 |           |           |           | Pu-6NO3-2EEE_geom2 |           |           |           | Pu-6NO3-2MEE_geom2 |           |           |           |
|--------------------|-----------|-----------|-----------|--------------------|-----------|-----------|-----------|--------------------|-----------|-----------|-----------|
| Pu                 | -0.000053 | -0.001001 | 0.000269  | Pu                 | -0.00003  | 0.000041  | 0.000029  | Pu                 | 0.000099  | -0.000077 | 0.000131  |
| O                  | 0.586634  | 1.610326  | -1.819105 | O                  | -0.249841 | 0.83901   | -2.351856 | O                  | -0.252629 | -2.407818 | -0.659541 |
| O                  | -0.626532 | 2.405585  | -0.25552  | O                  | -1.309751 | 1.94982   | -0.873027 | O                  | -1.188512 | -1.004074 | -1.961823 |
| O                  | -0.050302 | 3.673162  | -1.908276 | O                  | -1.507207 | 2.489355  | -2.956356 | O                  | -1.429574 | -3.120411 | -2.326216 |
| O                  | -0.377348 | 1.169007  | 2.271384  | O                  | -0.250342 | 1.860376  | 1.763834  | O                  | -0.082224 | 1.61457   | -2.001131 |
| O                  | -2.292793 | 1.586175  | 3.1795    | O                  | -2.066282 | 2.35258   | 2.827494  | O                  | -1.834076 | 2.668009  | -2.703082 |
| O                  | -2.152868 | 0.633732  | 1.239173  | O                  | -1.97923  | 0.662797  | 1.475046  | O                  | -1.901297 | 1.438937  | -0.920121 |
| O                  | 1.928721  | 1.537261  | 0.631128  | O                  | 1.469494  | 2.014636  | -0.46351  | O                  | 1.586778  | -0.652763 | -1.867888 |
| O                  | 3.546435  | 1.028361  | 1.971981  | O                  | 3.367847  | 2.438148  | 0.477953  | O                  | 3.529364  | 0.215347  | -2.243    |
| O                  | 1.923361  | -0.350886 | 1.613009  | O                  | 2.244814  | 0.663435  | 0.988138  | O                  | 2.311559  | 0.887922  | -0.588909 |
| N                  | -0.029667 | 2.613507  | -1.355218 | N                  | -1.03788  | 1.791138  | -2.105761 | N                  | -0.972024 | -2.224338 | -1.678278 |
| N                  | -1.614568 | 1.157296  | 2.290027  | N                  | -1.438417 | 1.675328  | 2.067534  | N                  | -1.274685 | 1.94992   | -1.929618 |
| N                  | 2.501639  | 0.754151  | 1.432296  | N                  | 2.395453  | 1.743047  | 0.339566  | N                  | 2.512259  | 0.151556  | -1.602616 |
| O                  | -0.586967 | -1.611998 | 1.819777  | O                  | 0.249773  | -0.838931 | 2.351917  | O                  | 0.252594  | 2.407698  | 0.659793  |
| O                  | 0.626151  | -2.407319 | 0.256161  | O                  | 1.309694  | -1.949735 | 0.873093  | O                  | 1.188839  | 1.004009  | 1.961891  |
| O                  | 0.050372  | -3.674694 | 1.909242  | O                  | 1.507115  | -2.489292 | 2.95642   | O                  | 1.429653  | 3.120361  | 2.326353  |
| O                  | 0.377208  | -1.170593 | -2.270629 | O                  | 0.250282  | -1.860297 | -1.763775 | O                  | 0.082336  | -1.614756 | 2.001331  |
| O                  | 2.292454  | -1.586678 | -3.179615 | O                  | 2.066219  | -2.352501 | -2.82744  | O                  | 1.834319  | -2.66779  | 2.703571  |
| O                  | 2.152926  | -0.635536 | -1.238637 | O                  | 1.979173  | -0.662718 | -1.474994 | O                  | 1.901388  | -1.439195 | 0.920274  |
| O                  | -1.929231 | -1.539143 | -0.630411 | O                  | -1.469561 | -2.014546 | 0.463578  | O                  | -1.586511 | 0.652579  | 1.868189  |
| O                  | -3.546783 | -1.030029 | -1.971393 | O                  | -3.367929 | -2.438041 | -0.477869 | O                  | -3.529423 | -0.21498  | 2.242909  |
| O                  | -1.923705 | 0.349107  | -1.612058 | O                  | -2.244869 | -0.663356 | -0.988085 | O                  | -2.31153  | -0.887812 | 0.588989  |
| N                  | 0.029446  | -2.615145 | 1.35602   | N                  | 1.03787   | -1.791012 | 2.105832  | N                  | 0.972056  | 2.224271  | 1.678487  |
| N                  | 1.6145    | -1.158564 | -2.289658 | N                  | 1.438357  | -1.675253 | -2.067474 | N                  | 1.27484   | -1.949989 | 1.929915  |
| N                  | -2.502014 | -0.755918 | -1.43147  | N                  | -2.395517 | -1.742961 | -0.339504 | N                  | -2.512197 | -0.151435 | 1.60269   |
| H                  | -3.616025 | 0.245944  | 1.201952  | H                  | -3.487951 | 0.424971  | 1.512526  | H                  | -3.418285 | 1.475661  | -0.812206 |
| H                  | 3.615933  | -0.245965 | -1.201836 | H                  | 3.487902  | -0.424889 | -1.512482 | H                  | 3.418393  | -1.476046 | 0.811904  |
| O                  | -4.460301 | -0.29822  | 1.019008  | O                  | -4.419735 | 0.030601  | 1.395734  | O                  | -4.377357 | 1.397876  | -0.472645 |
| C                  | -5.437684 | 0.264829  | 0.403613  | C                  | -5.014997 | 0.414129  | 0.31739   | C                  | -4.937813 | 0.265937  | -0.723816 |
| N                  | -6.33878  | -0.550335 | -0.086963 | N                  | -6.039041 | -0.299912 | -0.068558 | N                  | -6.005493 | -0.027005 | -0.030199 |
| O                  | 4.459487  | 0.299265  | -1.019192 | O                  | 4.419753  | -0.030651 | -1.395783 | O                  | 4.377304  | -1.398097 | 0.471984  |
| C                  | 5.437996  | -0.26252  | -0.404469 | C                  | 5.015023  | -0.414187 | -0.317445 | C                  | 4.937753  | -0.266217 | 0.723521  |
| N                  | 6.338698  | 0.55377   | 0.084971  | N                  | 6.039188  | 0.299734  | 0.068402  | N                  | 6.005143  | 0.027193  | 0.029671  |
| C                  | -5.526321 | 1.758572  | 0.294895  | C                  | -4.558549 | 1.647233  | -0.379392 | C                  | -4.416552 | -0.61839  | -1.796588 |
| C                  | -5.496935 | 2.392551  | 1.686047  | C                  | -4.994328 | 2.905439  | 0.374538  | H                  | -4.487961 | -1.670438 | -1.530769 |
| C                  | -4.415284 | 2.304942  | -0.608064 | H                  | -4.910039 | 1.665321  | -1.408685 | C                  | 4.416775  | 0.617335  | 1.797066  |
| H                  | -6.478703 | 2.002242  | -0.174876 | C                  | 4.558479  | -1.647213 | 0.379414  | H                  | 4.488892  | 1.669634  | 1.532486  |
| C                  | 5.52808   | -1.756113 | -0.294846 | H                  | 4.909984  | -1.665268 | 1.408703  | C                  | -6.761681 | -1.260291 | -0.234238 |
| H                  | 6.481386  | -1.998601 | 0.173676  | C                  | 4.994175  | -2.90549  | -0.374441 | H                  | -6.670802 | -1.564453 | -1.276206 |
| C                  | 4.418934  | -2.302732 | 0.61023   | C                  | -6.846239 | 0.031341  | -1.241602 | C                  | -6.320701 | -2.369875 | 0.701874  |
| C                  | 5.497238  | -2.391134 | -1.685484 | H                  | -6.881367 | 1.113608  | -1.359152 | H                  | -7.812928 | -1.010309 | -0.072621 |
| C                  | -7.569765 | -0.120149 | -0.747989 | C                  | -6.33945  | -0.645978 | -2.500459 | C                  | -6.463794 | 0.861261  | 1.042943  |
| H                  | -7.955975 | 0.773959  | -0.259926 | H                  | -7.865418 | -0.288061 | -1.012487 | C                  | -7.401138 | 1.93991   | 0.536035  |
| C                  | -7.390314 | 0.096057  | -2.238068 | C                  | -6.398642 | -1.529634 | 0.647059  | H                  | -6.959448 | 0.224673  | 1.777252  |
| H                  | -8.301244 | -0.908998 | -0.561115 | C                  | -7.357543 | -1.268562 | 1.792069  | H                  | -5.586329 | 1.289958  | 1.523445  |

|   |           |           |           |   |           |           |           |   |           |           |           |
|---|-----------|-----------|-----------|---|-----------|-----------|-----------|---|-----------|-----------|-----------|
| C | -6.118648 | -2.003782 | -0.027644 | H | -6.843957 | -2.19595  | -0.093362 | C | 6.761408  | 1.260359  | 0.234203  |
| C | -6.653303 | -2.615381 | 1.251967  | H | -5.480288 | -1.997834 | 0.995756  | H | 6.671106  | 1.563739  | 1.27645   |
| H | -6.620172 | -2.422146 | -0.902002 | C | 6.846399  | -0.03157  | 1.241422  | H | 7.812571  | 1.010523  | 0.071822  |
| H | -5.052778 | -2.189592 | -0.143686 | H | 6.881353  | -1.113835 | 1.359046  | C | 6.319882  | 2.370605  | -0.70086  |
| C | 7.570638  | 0.125067  | 0.745161  | H | 7.865617  | 0.287646  | 1.012223  | C | 6.463059  | -0.860366 | -1.044224 |
| H | 7.957334  | -0.768828 | 0.257084  | C | 6.339799  | 0.645924  | 2.500261  | H | 6.958224  | -0.223258 | -1.778414 |
| H | 8.301172  | 0.914577  | 0.557389  | C | 6.39896   | 1.529345  | -0.647324 | C | 7.400832  | -1.939151 | -0.538406 |
| C | 7.392674  | -0.090809 | 2.235467  | H | 6.844409  | 2.195644  | 0.09303   | H | 5.585426  | -1.288926 | -1.524536 |
| C | 6.116949  | 2.006963  | 0.0254    | C | 7.35778   | 1.268031  | -1.792347 | H | 8.279691  | -1.513194 | -0.048439 |
| H | 6.618716  | 2.426112  | 0.899248  | H | 5.480671  | 1.99767   | -0.996021 | H | 7.746288  | -2.545258 | -1.377786 |
| C | 6.64992   | 2.618813  | -1.254792 | H | 8.278439  | 0.790665  | -1.448058 | H | 6.892656  | -2.597638 | 0.167211  |
| H | 5.050963  | 2.191644  | 0.142201  | H | 7.627709  | 2.213907  | -2.265367 | H | -8.279828 | 1.513805  | 0.045894  |
| H | -4.588489 | 3.371454  | -0.761686 | H | 6.896406  | 0.631455  | -2.548427 | H | -6.892509 | 2.597894  | -0.169722 |
| H | -4.397946 | 1.812256  | -1.581276 | H | -8.278266 | -0.79132  | 1.447783  | H | -7.746901 | 2.546572  | 1.374889  |
| H | -3.427663 | 2.190131  | -0.162297 | H | -6.896298 | -0.631969 | 2.548213  | H | 5.272304  | 2.630505  | -0.541193 |
| H | 4.593054  | -3.36909  | 0.763872  | H | -7.627336 | -2.214518 | 2.265009  | H | 6.429637  | 2.078104  | -1.746305 |
| H | 3.430356  | -2.18865  | 0.166365  | H | 5.328742  | 0.317331  | 2.746335  | H | 6.930336  | 3.259114  | -0.529491 |
| H | 4.403133  | -1.809757 | 1.583334  | H | 6.314318  | 1.730779  | 2.384657  | H | -6.431098 | -2.076656 | 1.74705   |
| H | 7.719119  | 2.430321  | -1.380559 | H | 6.997668  | 0.407071  | 3.33796   | H | -5.273025 | -2.629869 | 0.543012  |
| H | 6.50045   | 3.699626  | -1.23034  | H | -6.313793 | -1.730837 | -2.384931 | H | -6.931036 | -3.258517 | 0.530758  |
| H | 6.120154  | 2.225612  | -2.123166 | H | -5.328434 | -0.317196 | -2.746449 | H | -3.37143  | -0.394208 | -2.000072 |
| H | -7.722389 | -2.425716 | 1.376949  | H | -6.997309 | -0.407176 | -3.338179 | H | 3.371454  | 0.393485  | 1.999936  |
| H | -6.123776 | -2.223021 | 2.120866  | H | 4.604944  | -2.90987  | -1.393764 | H | 4.994085  | 0.441799  | 2.710397  |
| H | -6.505045 | -3.696357 | 1.227325  | H | 6.082051  | -2.997554 | -0.419523 | H | -4.994277 | -0.444291 | -2.709926 |
| H | 6.708579  | -0.916447 | 2.437456  | H | -6.082209 | 2.997442  | 0.419614  |   |           |           |           |
| H | 6.98834   | 0.800459  | 2.718415  | H | -4.605109 | 2.909774  | 1.393866  |   |           |           |           |
| H | 8.356304  | -0.321793 | 2.693523  | H | -3.467741 | 1.608075  | -0.427481 |   |           |           |           |
| H | -6.986729 | -0.795545 | -2.72102  | H | 3.467669  | -1.608027 | 0.427511  |   |           |           |           |
| H | -6.704974 | 0.920875  | -2.43919  | H | 4.596694  | -3.781501 | 0.138221  |   |           |           |           |
| H | -8.353275 | 0.328473  | -2.696807 | H | -4.596888 | 3.781503  | -0.138064 |   |           |           |           |
| H | 4.550271  | -2.205417 | -2.195126 |   |           |           |           |   |           |           |           |
| H | 5.613454  | -3.471335 | -1.583151 |   |           |           |           |   |           |           |           |
| H | 6.306677  | -2.021069 | -2.319294 |   |           |           |           |   |           |           |           |
| H | -6.307508 | 2.022667  | 2.318515  |   |           |           |           |   |           |           |           |
| H | -5.61219  | 3.47291   | 1.584303  |   |           |           |           |   |           |           |           |
| H | -4.550773 | 2.205696  | 2.196778  |   |           |           |           |   |           |           |           |

| Pu-6NO3-2MME_geom2 |           |           | Pu-6NO3-2EMM_geom2 |    |           | Pu-6NO3-2MMM_geom2 |           |    |           |           |           |
|--------------------|-----------|-----------|--------------------|----|-----------|--------------------|-----------|----|-----------|-----------|-----------|
| Pu                 | -0.00001  | 0.000021  | 0.000006           | Pu | -0.000009 | -0.000014          | -0.000006 | Pu | -0.000001 | -0.000001 | 0.000001  |
| O                  | 0.396089  | 1.826145  | -1.672349          | O  | -0.296262 | -0.824804          | 2.350426  | O  | -0.141775 | 1.183962  | 2.281185  |
| O                  | 1.256203  | -0.060712 | -2.164882          | O  | -1.425824 | -1.865892          | 0.87241   | O  | -1.925457 | 0.209505  | 1.668077  |
| O                  | 1.621718  | 1.642897  | -3.443031          | O  | -1.65157  | -2.395645          | 2.955358  | O  | -1.914028 | 1.356945  | 3.506281  |
| O                  | -0.003921 | -2.34993  | -1.046123          | O  | -0.374346 | -1.839279          | -1.766921 | O  | -1.519539 | -2.028136 | -0.168231 |
| O                  | 1.686561  | -3.693342 | -1.140695          | O  | -2.227324 | -2.220369          | -2.812679 | O  | -3.45683  | -2.080846 | -1.12401  |
| O                  | 1.817799  | -1.792878 | -0.10842           | O  | -2.022042 | -0.535404          | -1.466456 | O  | -2.293997 | -0.260172 | -1.067045 |
| O                  | -1.537886 | -0.191434 | -2.012127          | O  | 1.339916  | -2.106088          | 0.455697  | O  | 0.283298  | -1.559054 | 1.943092  |
| O                  | -3.526161 | -1.037325 | -2.009298          | O  | 3.215615  | -2.63627           | -0.477474 | O  | 1.518365  | -3.332694 | 1.941481  |
| O                  | -2.355502 | -0.942624 | -0.195425          | O  | 2.198073  | -0.800151          | -0.990671 | O  | 1.258001  | -2.159925 | 0.145386  |
| N                  | 1.109393  | 1.163506  | -2.47369           | N  | -1.142175 | -1.726283          | 2.104933  | N  | -1.330575 | 0.95058   | 2.546969  |
| N                  | 1.166631  | -2.675459 | -0.794624          | N  | -1.55091  | -1.582431          | -2.061317 | N  | -2.458188 | -1.490458 | -0.802624 |
| N                  | -2.508599 | -0.739152 | -1.438139          | N  | 2.283245  | -1.887453          | -0.34308  | N  | 1.036143  | -2.395748 | 1.374405  |
| O                  | -0.396135 | -1.82611  | 1.67235            | O  | 0.296242  | 0.824774           | -2.350438 | O  | 0.141776  | -1.183965 | -2.281184 |
| O                  | -1.256206 | 0.060765  | 2.164891           | O  | 1.425807  | 1.86586            | -0.872424 | O  | 1.925458  | -0.209509 | -1.668076 |
| O                  | -1.621817 | -1.642855 | 3.442995           | O  | 1.651546  | 2.395619           | -2.955373 | O  | 1.914029  | -1.356954 | -3.506278 |
| O                  | 0.003905  | 2.349963  | 1.046141           | O  | 0.374327  | 1.839252           | 1.76691   | O  | 1.519544  | 2.028132  | 0.168226  |



|   |           |           |           |   |           |           |           |   |           |           |           |
|---|-----------|-----------|-----------|---|-----------|-----------|-----------|---|-----------|-----------|-----------|
| O | -1.68657  | 3.693381  | 1.140745  | O | 2.2273    | 2.220342  | 2.812678  | O | 3.456834  | 2.08084   | 1.124006  |
| O | -1.817822 | 1.792931  | 0.108445  | O | 2.022026  | 0.535378  | 1.466453  | O | 2.293996  | 0.260169  | 1.067047  |
| O | 1.537857  | 0.191472  | 2.01214   | O | -1.339933 | 2.10606   | -0.455711 | O | -0.283298 | 1.559053  | -1.943093 |
| O | 3.526143  | 1.037336  | 2.009313  | O | -3.215631 | 2.636245  | 0.477465  | O | -1.518359 | 3.332697  | -1.941476 |
| O | 2.355486  | 0.942642  | 0.195438  | O | -2.198092 | 0.800122  | 0.990653  | O | -1.257995 | 2.159925  | -0.145383 |
| N | -1.109364 | -1.163439 | 2.473732  | N | 1.142186  | 1.726225  | -2.10495  | N | 1.330576  | -0.950585 | -2.546967 |
| N | -1.166671 | 2.675463  | 0.794724  | N | 1.550888  | 1.582402  | 2.061315  | N | 2.458191  | 1.490454  | 0.802622  |
| N | 2.508598  | 0.739129  | 1.438141  | N | -2.283286 | 1.887404  | 0.343034  | N | -1.036139 | 2.395748  | -1.374403 |
| H | 3.322804  | -1.855829 | 0.054968  | H | -3.49836  | -0.206373 | -1.482581 | H | -3.42234  | 0.05163   | 1.6358    |
| H | -3.322827 | 1.855872  | -0.054928 | H | 3.498349  | 0.206343  | 1.482593  | H | 3.422338  | -0.051637 | -1.635808 |
| O | 4.282918  | -1.683985 | 0.35945   | O | -4.404597 | 0.250844  | -1.362898 | O | -4.369987 | -0.269387 | 1.416828  |
| C | 4.922866  | -0.821793 | -0.34839  | C | -5.016203 | -0.071468 | -0.277541 | C | -4.937328 | 0.35951   | 0.451009  |
| N | 6.018516  | -0.346056 | 0.182777  | N | -5.987284 | 0.717763  | 0.106584  | N | -5.96763  | -0.218446 | -0.112775 |
| O | -4.282931 | 1.683986  | -0.35941  | O | 4.404618  | -0.250821 | 1.362947  | O | 4.369986  | 0.269382  | -1.416839 |
| C | -4.922834 | 0.821735  | 0.348398  | C | 5.016221  | 0.07149   | 0.277586  | C | 4.937327  | -0.359505 | -0.451014 |
| N | -6.018457 | 0.345961  | -0.182794 | N | 5.987368  | -0.71766  | -0.106537 | N | 5.967628  | 0.218456  | 0.112767  |
| C | 4.460236  | -0.438402 | -1.706604 | C | -4.647353 | -1.320583 | 0.442867  | C | -4.469703 | 1.705357  | 0.030915  |
| H | 4.488139  | 0.640976  | -1.846662 | C | -5.281885 | -2.550482 | -0.209698 | H | -3.491956 | 1.919165  | 0.455321  |
| C | -4.460245 | 0.438335  | 1.706624  | H | -4.909762 | -1.249498 | 1.496797  | H | -4.384597 | 1.773538  | -1.052536 |
| H | -4.487739 | -0.641082 | 1.846488  | C | 4.647331  | 1.320577  | -0.442842 | C | 4.469706  | -1.70535  | -0.030908 |
| C | 6.84818   | 0.65668   | -0.478647 | H | 4.909759  | 1.249475  | -1.496768 | H | 5.179101  | -2.462026 | -0.379061 |
| H | 6.688127  | 0.588847  | -1.553265 | C | 5.281827  | 2.550505  | 0.209701  | H | 4.38459   | -1.773518 | 1.052543  |
| C | 6.564989  | 2.058917  | 0.0263    | C | -6.83378  | 0.44289   | 1.252768  | C | -6.717038 | 0.396453  | -1.191063 |
| H | 7.888686  | 0.377368  | -0.296076 | H | -6.853276 | -0.616903 | 1.487211  | H | -7.771883 | 0.150941  | -1.063808 |
| C | 6.370056  | -0.729891 | 1.546303  | H | -7.84922  | 0.759135  | 1.011648  | H | -6.610022 | 1.477015  | -1.181184 |
| H | 7.292353  | -0.221348 | 1.816919  | C | -6.250782 | 1.979522  | -0.570497 | H | -6.376176 | 0.005493  | -2.153066 |
| H | 5.574219  | -0.439269 | 2.232352  | H | -6.420062 | 2.743797  | 0.188292  | C | -6.367328 | -1.574909 | 0.228129  |
| C | -6.848061 | -0.65687  | 0.478563  | H | -5.39697  | 2.263875  | -1.175909 | H | -6.456107 | -2.149584 | -0.694535 |
| H | -6.68795  | -0.589156 | 1.553179  | C | 6.833794  | -0.442689 | -1.252745 | H | -5.619464 | -2.036925 | 0.862859  |
| H | -7.888586 | -0.377574 | 0.296074  | H | 6.853138  | 0.617109  | -1.487189 | H | -7.332137 | -1.556554 | 0.73998   |
| C | -6.564838 | -2.059042 | -0.026548 | H | 7.849283  | -0.7588   | -1.011654 | C | 6.717023  | -0.396429 | 1.191073  |
| C | -6.370012 | 0.729832  | -1.546306 | C | 6.251032  | -1.979392 | 0.570538  | H | 6.610033  | -1.476994 | 1.181186  |
| H | -7.292338 | 0.221335  | -1.816908 | H | 6.420363  | -2.743648 | -0.188259 | H | 7.771865  | -0.150891 | 1.063845  |
| H | -5.574204 | 0.439191  | -2.232381 | H | 5.397284  | -2.263847 | 1.175988  | H | 6.376128  | -0.005482 | 2.153069  |
| H | -5.525295 | -2.338733 | 0.151641  | H | 4.982643  | 2.63824   | 1.255432  | C | 6.367324  | 1.574918  | -0.228142 |
| H | -6.75066  | -2.141738 | -1.098739 | H | 6.373323  | 2.522791  | 0.165399  | H | 6.456028  | 2.14962   | 0.694513  |
| H | -7.213312 | -2.771438 | 0.486596  | H | -6.37338  | -2.522744 | -0.165387 | H | 7.332169  | 1.556565  | -0.739925 |
| H | 6.750758  | 2.141713  | 1.098494  | H | -4.98271  | -2.638201 | -1.255432 | H | 5.619497  | 2.036904  | -0.862937 |
| H | 5.525466  | 2.338633  | -0.15197  | H | -3.55945  | -1.406369 | 0.40718   | H | 3.491965  | -1.91917  | -0.455321 |
| H | 7.213515  | 2.771236  | -0.486883 | H | 3.559425  | 1.406347  | -0.407159 | H | -5.179089 | 2.462032  | 0.379086  |
| H | 3.43648   | -0.766759 | -1.868853 | H | 4.940676  | 3.444714  | -0.312006 |   |           |           |           |
| H | -3.436643 | 0.767051  | 1.869118  | H | 6.486228  | -1.005737 | -2.122243 |   |           |           |           |
| H | 6.517383  | -1.808195 | 1.608694  | H | 7.140794  | -1.887679 | 1.197944  |   |           |           |           |
| H | 5.105489  | -0.907715 | -2.454999 | H | -7.140524 | 1.887907  | -1.197945 |   |           |           |           |
| H | -6.517295 | 1.808143  | -1.608674 | H | -6.486169 | 1.00589   | 2.122279  |   |           |           |           |
| H | -5.105802 | 0.907255  | 2.455     | H | -4.94075  | -3.44471  | 0.311988  |   |           |           |           |

## References

- [1] Michael Meot-Ner (Mautner). "The proton affinity scale, and effects of ion structure and solvation". In: *International Journal of Mass Spectrometry* 227.3 (2003). Thermochemistry and Solvation of Gas Phase Ions, pp. 525–554. ISSN: 1387-3806. DOI: [https://doi.org/10.1016/S1387-3806\(03\)00100-3](https://doi.org/10.1016/S1387-3806(03)00100-3). URL: <http://www.sciencedirect.com/science/article/pii/S1387380603001003>.
- [2] J. P. Foster and F. Weinhold. "Natural hybrid orbitals". In: *Journal of the American Chemical Society* 102.24 (Nov. 1980), pp. 7211–7218. ISSN: 0002-7863. DOI: 10.1021/ja00544a007. URL: <https://doi.org/10.1021/ja00544a007>.
