# Supplementary material for: Insights from quantum chemical calculations into inner and outer-sphere complexation of plutonium(iv) by monoamide and carbamide extractants
Source: Royal Society of Chemistry journal article supplement (doi:10.1039/d0cp05363e), 2021-01-01
Supplement: d0cp05363e2.pdf [file d0cp05363e2.pdf]

**Supporting Information:**  
**Insights from quantum chemical calculations**  
**into inner and outer-sphere complexation of**  
**plutonium(IV) by monoamide and carbamide**  
**extractants**

Abdelmounaim Failali,<sup>†</sup> Eléonor Acher,<sup>†</sup> Valérie Vallet,<sup>‡</sup> Florent Réal,<sup>‡</sup> and  
Dominique Guillaumont<sup>\*,†</sup>

<sup>†</sup>*CEA, DES, ISEC, DMRC, Univ Montpellier, Marcoule, F-30207 Bagnols-sur-Ceze Cedex,  
France*

<sup>‡</sup>*Université Lille, CNRS, UMR 8523-PhLAM-Physique des Lasers, Atomes et Molécules,  
F-59000 Lille, France*

E-mail: dominique.guillaumont@cea.fr

# Large-core and small-core pseudopotential results

Table S1: Calculated complexation energies for ligand exchange reactions (3) and (4).  $\Delta E$  values are in  $\text{kJ mol}^{-1}$  and were calculated in the gas phase using PBE0 with large-core (LC) and small-core (SC) RECPs.

|                       | inner-sphere |    | outer sphere |    |
|-----------------------|--------------|----|--------------|----|
|                       | LC           | SC | LC           | SC |
| MEE $\rightarrow$ EEE | 4            | 2  | 0            | 0  |
| EEE $\rightarrow$ PEE | -4           | -6 | -6           | -7 |
| PEE $\rightarrow$ IEE | 12           | 16 | 38           | 36 |

## Intrinsic properties of the ligands

Intrinsic properties of the ligands, such as basicity and electronic properties are important parameters for understanding their ability to bind a metal ion. We hereafter report atomic charges, molecular polarizabilities and proton affinities of the ligands, computed as the the enthalpy change associated with the following gas-phase reaction:

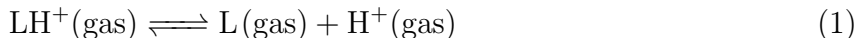

The computed atomic charges and molecular polarizabilities for the different ligands are reported in Table S2. Atomic charges were determined from a Natural Population Analysis (NPA).<sup>S1</sup> The charges of the complexing oxygen atom are slightly affected by the lengthening of the alkyl chains, they vary from -0.61 to -0.63 for monoamides and from -0.63 to -0.65 for carbamides. Carbon and nitrogen electronic charges vary between monoamides and carbamides but do not vary significantly when changing the alkyl groups. The molecular polarizability shows a notable increase, from  $8.9 \text{ \AA}^3$  for MMM to  $15.9 \text{ \AA}^3$  for PEE. This rise was expected, since the increase in polarizability is equal to expected addition of polarizability for  $-\text{CH}_2-$  groups ( $\simeq 1.8 \text{ \AA}^3$  per group). As polarizability increases, the dispersion forces are expected to become stronger.

Table S2: Electronic atomic charges (NPA charges  $q_O$ ,  $q_N$  and  $q_C$ ), molecular polarizabilities ( $\alpha$  in  $\text{\AA}^3$ ) and proton affinity (PA) for the different amide ligands in  $\text{kJ mol}^{-1}$ , relative to that of the MMM ligand.

| Charges | $q_O$  | $q_N$  | $q_C$ | $\alpha$ | PA |
|---------|--------|--------|-------|----------|----|
| MMM     | -0.613 | -0.409 | 0.653 | 8.9      | 0  |
| MME     | -0.614 | -0.410 | 0.658 | 10.6     | 8  |
| EMM     | -0.617 | -0.411 | 0.652 | 10.6     | 10 |
| EEM     | -0.618 | -0.413 | 0.657 | 12.3     | 16 |
| MEE     | -0.621 | -0.415 | 0.657 | 12.3     | 14 |
| EEE     | -0.625 | -0.414 | 0.659 | 14.1     | 22 |
| PEE     | -0.623 | -0.413 | 0.662 | 15.9     | 27 |
| IEE     | -0.628 | -0.415 | 0.665 | 15.8     | 28 |
| C4M     | -0.631 | -0.441 | 0.761 | 11.8     | 23 |
| C4E     | -0.652 | -0.445 | 0.778 | 18.9     | 40 |

The proton affinities (PA) of the ligands relative to that of the MMM ligand are reported in Table S2. For monoamides, the protonation energy increases when substituting a methyl by an ethyl group, by  $10 \text{ kJ mol}^{-1}$  in  $R_1$  position and by  $8 \text{ kJ mol}^{-1}$  in  $R_2$  or  $R_3$  positions. As expected, the proton affinities tend to increase with the oxygen electronic charge and with the size of the alkyl chain. A similar observation can be made for carbamides, the protonation affinity increased from 23 up to  $40 \text{ kJ mol}^{-1}$  by substituting methyl groups into ethyl. As reported in literature, for organic molecules the proton affinities tend to increase with the size and polarizability of the alkyl substituent.<sup>S2</sup>

## The structural parameters for geometry I

Table S3: Selected interatomic distances (average values  $d$  in Å)<sup>a</sup> and hydrogen bond angle ( $\alpha_{\text{O-H-O}}$ ) in ° calculated in the  $[\text{Pu}(\text{NO}_3)_6](\text{HL}_2)$  complex in geometry I optimized the gas phase. <sup>a</sup>  $O_{\text{nit}1}$  denotes oxygen from nitrate ions which are not involve in hydrogen bond.  $O_{\text{nit}}$  denotes oxygen from nitrate ions which are involved in hydrogen bond.

| Ligand | $d_{\text{O}_{\text{nit}}-\text{O}_L}$ | $d_{\text{Pu}-\text{O}_{\text{nit}1}}$ | $d_{\text{Pu}-\text{N}_{\text{nit}2}}$ | $d_{\text{Pu}-\text{N}_L}$ | $d_{\text{Pu}-\text{C}_{\text{R}1}}$ | $\alpha_{\text{HOH}}$ |
|--------|----------------------------------------|----------------------------------------|----------------------------------------|----------------------------|--------------------------------------|-----------------------|
| MMM    | 2.568                                  | 2.544                                  | 2.976                                  | 5.605                      | 4.910                                | 169.8                 |
| MME    | 2.598                                  | 2.541                                  | 2.972                                  | 5.536                      | 4.905                                | 169.4                 |
| EMM    | 2.603                                  | 2.526                                  | 2.992                                  | 5.411                      | 5.176                                | 165.3                 |
| EEM    | 2.595                                  | 2.514                                  | 2.959                                  | 5.386                      | 5.129                                | 163.0                 |
| MEE    | 2.566                                  | 2.544                                  | 2.978                                  | 5.720                      | 4.897                                | 170.1                 |
| EEE    | 2.589                                  | 2.537                                  | 2.968                                  | 5.703                      | 5.167                                | 163.4                 |
| PEE    | 2.594                                  | 2.537                                  | 2.974                                  | 5.839                      | 5.122                                | 163.4                 |
| IEE    | 2.551                                  | 2.537                                  | 2.969                                  | 5.682                      | 5.996                                | 158.4                 |
| C4M    | 2.592                                  | 2.529                                  | 2.957                                  | 5.427                      | 5.793                                | 171.8                 |
| C4E    | 2.573                                  | 2.540                                  | 2.972                                  | 5.584                      | 5.947                                | 168.2                 |

## References

- (S1) Foster, J. P.; Weinhold, F. Natural hybrid orbitals. *J. Am. Chem. Soc.* **1980**, *102*, 7211–7218, DOI: 10.1021/ja00544a007.
- (S2) Meot-Ner (Mautner), M. The proton affinity scale, and effects of ion structure and solvation. *Int. J. Mass Spectrom.* **2003**, *227*, 525 – 554, DOI: 10.1016/S1387-3806(03)00100-3.
